# Supplementary material
Source: Research Square preprint supplement (doi:10.21203/rs.3.rs-8703835/v1)
Supplement: Supplementary file 1 [file 8ece21d46dacb980c3fc18c2.docx]

Table 2. Novel and candidate gene findings identified through the RareBoost diagnostic framework

| Family ID | Patient ID | Sex | Age of onset | Clinical Presentation | Molecular Diagnosis | Zyg / Mode of  Inheritance | Gene Constraint Score (gnomAD v4.1.0) | Publication |
| --- | --- | --- | --- | --- | --- | --- | --- | --- |
| 1 | 1 | M | Childhood onset | Ataxia HP:0001251, Hearing impairment HP:0000365, Global developmental delay HP:0001263, Neurodevelopmental delay HP:0012758, Osteochondroma HP:0030431, Motor delay HP:0001270, Encephalopathy HP:0001298, Kyphoscoliosis HP:0002751, Nail dystrophy HP:0008404, Loss of ambulation HP:0002505, Positive Romberg sign HP:0002403, Muscle weakness HP:0001324, Hyperintensity of cerebral white matter on MRI HP:0030890, Polyneuropathy HP:0001271, Pigmentary retinopathy HP:0000580, Seizure HP:0001250 | *BECN2* (NM_001290693.1):c.1291_1292del (p.Lys431Valfs*?) | Hom, AR | Missense: Z = 0.32; o/e = 0.96 (0.89–1.04)  pLoF: pLI = 0.48; o/e = 0 (0–1.53) | *BECN2* is essential for autophagy-lysosomal trafficking and axonal homeostasis. Loss of *BECN2* impairs the clearance of damaged organelles and disrupts endolysosomal turnover in neurons, making long peripheral axons particularly vulnerable to metabolic and structural stress. This defect in axonal maintenance provides a plausible mechanistic explanation for the patient’s neuropathy phenotype52. |
| 2 | 2.1 | M | Childhood onset | Ataxia HP:0001251, Dysmetria HP:0001310, Dysarthria HP:0001260, Wide nasal bridge HP:0000431, Long philtrum HP:0000343, Hypotonia HP:0001252 | *CAMTA1* (NM_015215.4 ): c.218G>T (p.Arg73Leu) | Hom, AR | Missense: Z = 4.77; o/e = 0.72 (0.69–0.75)  pLoF: pLI = 1; o/e = 0.16 (0.12–0.23) | The variants were inherited from heterozygous parents, and among the two unaffected siblings, one was wild-type and the other heterozygous. Although no biallelic *CAMTA1* cases have been previously reported, reduced penetrance and variable expressivity described in OMIM may explain the intrafamilial variability observed in this family. |
| 2.2 | F |
| 17 | 17 | M | Congenital onset | Seizure HP:0001250, Neurodevelopmental delay HP:0012758, Microcephaly HP:0000252, Pectus carinatum HP:0000768, Hypotonia HP:0001252, Global developmental delay HP:0001263, Absent speech HP:0001344, Inability to walk HP:0002540, Feeding difficulties HP:0011968, Narrow forehead HP:0000341, Low anterior hairline HP:0000294, Deeply set eye HP:0000490, Thick eyebrow HP:0000574, Long eyelashes HP:0000527, Curly eyelashes HP:0007665, Coarse facial features HP:0000280, High palate HP:0000218, High, narrow palate HP:0002705, Protruding ear HP:0000411, Diffuse cerebral atrophy HP:0002506, Diffuse cerebellar atrophy HP:0100275, EEG abnormality HP:0002353, Chorioretinal atrophy HP:0000533, Retrognathia HP:0000278, Micrognathia HP:0000347 | *FGF22* (NM_020637.2):c.17G>A (p.Trp6*) | Hom, AR | Missense: Z = –3.58; o/e = 1.68 (1.54–1.84)  pLoF: pLI = 0.09; o/e = 0.54 (0.28–1.15) | FGF22 acts as a critical organizing protein for the development of retinogeniculate synapses, and the proper formation of retinal nerve terminals in the dLGN relies on *FGF22* signaling in mice54. Also, *FGF22* has been shown to play a role in neurogenesis and gliogenesis during zebrafish brain development, while various *FGF* proteins contribute to neuronal differentiation in the human brain55. |
| 24 | 24.1 | F | Childhood onset | Seizure HP:0001250, EEG abnormality HP:0002353, Periventricular leukomalacia HP:0006970 | *ATP1B4* (NM_001142447.3):c.734C>G (p.Pro245Arg) | Het, AD | Missense: Z = 0.22; o/e = 0.95 (0.82–1.09)  pLoF: pLI = 0; o/e = 0.51 (0.30–0.92)  (gnomAD v2.1.1, gnomAD v4.1.0 data is not available) | Na⁺/K⁺-ATPase dysfunction can lead to neuronal hyperexcitability and seizures56. Since *ATP1B4* encodes a β-subunit important for pump stability and localization, the heterozygous familial variant shared by the proband, affected mother, and affected aunt may potentially contribute to the epilepsy phenotype, although a definitive causal link cannot be established. |
| 24.2 | F |
| 24.3 | F |
| 48 | 48.1 | M | Childhood onset | Complex febrile seizure HP:0011172, EEG abnormality HP:0002353 | *BSN* (NM_003458.4):c.3378C>G (p.Tyr1126*) | Het, AD | Missense: Z = 3.33; o/e = 0.87 (0.85–0.90)  pLoF: pLI = 1; o/e = 0.22 (0.17–0.27) | *BSN* variants have been reported in association with febrile seizures and related epilepsy phenotypes57. In our family, the variant is shared by the affected father and child, consistent with this reported pattern and suggesting *BSN* as a plausible contributor to their febrile seizure history. |
| 48.2 | M |
| 50 | 50 | F | Congenital onset | Developmental cataract HP:0000519, Glaucoma HP:0000501, Motor delay HP:0001270, Inability to walk HP:0002540 | *LRP1* (NM_002332.3):c.9845A>G (p.His3282Arg) | Hom, AR | Missense: Z = 12.04; o/e = 0.59 (0.58–0.61)  pLoF: pLI = 1; o/e = 0.09 (0.07–0.12) | A homozygous *LRP1* variant was identified, representing the second independent family with a phenotype overlapping the previously reported sibling pair, including developmental delay, ocular findings, and skeletal anomalies58. This recurrence supports emerging *LRP1* involvement in neurodevelopment, and the gene’s conserved neuronal functions make it a plausible candidate. |
| 62 | 62 | M | Infantile onset | Elevated circulating hepatic transaminase concentration HP:0002910, Hepatic failure HP:0001399, Elevated circulating alanine aminotransferase concentration HP:0031964, Hepatomegaly HP:0002240, Cafe-au-lait spot HP:0000957, Microretrognathia HP:0000308, Hepatic steatosis HP:0001397 | *PHKG1* (NM_006213.5): c.446G>A  (p.Arg149Gln) | Hom, AR | Missense: Z = 0.81; o/e = 0.9 (0.83–0.97)  pLoF: pLI =0.1; o/e = 1.02 (0.81-1.31) | *PHKG1* is not yet associated with a defined syndrome in OMIM. However, the *PHKG1* protein is a component of the glycogen phosphorylase kinase complex, together with *PHKA1* (MIM: 300559), *PHKA2* (MIM: 306000), and *PHKG2* (MIM: 613027), which is essential for glycogen breakdown. Although PHKG1 has been suggested in the literature as a potential candidate gene for glycogen storage disease, a definitive clinical association has not been established. |

This table summarizes families with novel or candidate disease-associated genes identified through the RareBoost diagnostic framework. Clinical features are described using Human Phenotype Ontology (HPO) terms. Molecular findings include variant annotations, zygosity, and inferred modes of inheritance, with gene constraint metrics derived from gnomAD v4.1.0. Supporting evidence from segregation analysis, functional inference, or relevant literature is provided where available.
