# Supplementary material
Source: Research Square preprint supplement (doi:10.21203/rs.3.rs-8703835/v1)
Supplement: Supplementary file 2 [file cce23e24f8e42048f470618f.docx]

**Table 1. Cohort Characteristics of the RareBoost Study (n=120)**

|  |  | **n (=120)** | **Percentage (%)** |
| --- | --- | --- | --- |
| Gender | Female | 50 | 41.7 |
| Male | 70 | 58.3 |
| Age of onset |  |  |  |
|  | Group 1 (≤1 month) | 41 | 34.2 |
|  | Group 2 (>1 month - ≤1 year) | 40 | 33.3 |
|  | Group 3 (>1 - ≤6 years) | 24 | 20.0 |
|  | Group 4 (>6 - ≤12 years) | 6 | 5.0 |
|  | Group 5 (>12 - ≤18 years) | 4 | 3.3 |
|  | Group 6 (>18 years) | 4 | 3.3 |
| Timing in diagnostic odyssey (solved) | ≤5 years | 21 | 17.5 |
|  | >5 years | 38 | 31.7 |
| Parental consanguinity |  | 52 | 43.3 |
| Families with ≥2 affected individuals |  | 36 | 30.0 |
| Previous genetic testing | No | 1 | 0.8 |
|  | Yes | 119 | 99.2 |
|  | ES | 74 | 61.7 |
|  | CES | 5 | 4.2 |
|  | CMA | 52 | 43.3 |
|  | Karyotype | 49 | 40.8 |
|  | Other (NGS panel, Sanger seq.) | 50 | 41.7 |
|  | RNA-seq | 0 | 0 |
| ES reanalysis |  | 75 | 62.5 |
| GS | Solo | 23 | 19.2 |
|  | Duo | 5 | 4.2 |
|  | Trio | 31 | 25.8 |

This table summarizes the demographic, clinical, and genetic characteristics of the RareBoost study cohort. Variables include sex, age of onset of disease, timing in diagnostic odyssey for potentially solved cases, parental consanguinity, family history, and prior genetic testing. The distribution of genomic analyses performed, including exome sequencing (ES), genome sequencing (GS), and ES reanalysis, is also shown. All counts and percentages are reported per family based on the proband. Percentages are calculated based on the total cohort size unless otherwise indicated.
