# Supplementary material
Source: Research Square preprint supplement (doi:10.21203/rs.3.rs-8703835/v1)
Supplement: Supplementary file 3 [file e8d5da3ccb92b0aaee20145d.xlsx]

## Sheet: Supplementary Table 1
Supplementary Table 1. P/LP and VUS variants identified in the study cohort and clinical data of the patients harboring these variants.
Family ID	Patient ID	Sex	Clinical onset	Clinical Presentation	Diagnostic Method	Genotype	Chromosomal Positon	Variant type	Zygosity	ACMG criteria	OMIM
1	1	M	Childhood onset	Ataxia HP:0001251, Hearing impairment HP:0000365, Global developmental delay HP:0001263, Neurodevelopmental delay HP:0012758, Osteochondroma HP:0030431, Motor delay HP:0001270, Encephalopathy HP:0001298, Kyphoscoliosis HP:0002751, Nail dystrophy HP:0008404, Loss of ambulation HP:0002505, Positive Romberg sign HP:0002403, Muscle weakness HP:0001324, Hyperintensity of cerebral white matter on MRI H…	ES	BECN2 (NM_001290693.1 ):c.1291_1292del (p.Lys431Valfs*?) LBR (NM_002296.4):c.43C>T : (p.Arg15*) SLC26A4 (NM_000441.2) :c.397T>A (p.Ser133Thr)	chr1-241959054 CAA>C chr1-225424033 G>A chr7-107672230 T>A	Frameshift Frameshift Missense	Hom Het Hom	VUS (PM2) P (PS4, PVS1, PM2) P (PM3, PP1, PM1, PP2, PM2, PM5, PP3)	BECN2 gene has not been previously associated with any disease in OMIM. Pelger-Huet anomaly (MIM: 169400) Deafness, autosomal recessive 4, with enlarged vestibular aqueduct (MIM: 600791)
2	2025-01-02	M	Childhood onset	Ataxia HP:0001251, Dysmetria HP:0001310, Dysarthria HP:0001260, Wide nasal bridge HP:0000431, Long philtrum HP:0000343, Hypotonia HP:0001252	Duo ES	CAMTA1 (NM_015215.4 ): c.218G>T (p.Arg73Leu)	chr1-6825194 G>T	Missense	Hom	VUS (PM2,PP2)	Cerebellar dysfunction with variable cognitive and behavioral abnormalities (MIM #614756)
	2025-02-02	F	Childhood onset	Ataxia HP:0001251, Dysmetria HP:0001310, Dysarthria HP:0001260, Wide nasal bridge HP:0000431, Long philtrum HP:0000343, Hypotonia HP:0001252, Global developmental delay HP:0001263	Duo ES	CAMTA1 (NM_015215.4 ): c.218G>T (p.Arg73Leu)	chr1-6825194 G>T	Missense	Hom	VUS (PM2,PP2)	Cerebellar dysfunction with variable cognitive and behavioral abnormalities (MIM #614756)
3	3	M	Juvenile onset	Intellectual disability HP:0001249, Attention deficit hyperactivity disorder HP:0007018, Ataxia HP:0001251, Progressive cerebellar ataxia HP:0002073, Gait ataxia HP:0002066, Prolonged prothrombin time HP:0008151, Prolonged bleeding time HP:0003010, Gingival bleeding HP:0000225, Epistaxis HP:0000421, Long face HP:0000276, Disproportionate tall stature HP:0001519, Dilated cardiomyopathy HP:0001644,…	ES	ITPR1 (NM_001378452.1) :c.4209G>T ( p.Glu1403Asp)	chr3-4693669 G>T	Missense	Het (DN)	LP (PM2,PP2,PP3,PM6)	Spinocerebellar ataxia 15 (MIM #606658)
4	4	F	Congenital onset	Abnormal glycosylation HP:0012345, Kyphosis HP:0002808, Scoliosis HP:0002650, Hemivertebrae HP:0002937, Syringomyelia HP:0003396, Short stature HP:0004322, Decreased body weight HP:0004325, Pectus carinatum HP:0000768, Immunodeficiency HP:0002721, Hypogonadotropic hypogonadism HP:0000044, Aplasia of the ovary HP:0010463, Long philtrum HP:0000343, Epicanthus HP:0000286, Camptodactyly HP:0012385, C…	Trio GS	SIN3A (NM_001145358.2):c.-34G>C	chr15-75451423 C>G	Splice Site Region	Het (Maternal)	VUS (PM2,PP3)	Witteveen-Kolk syndrome (MIM: 613406)
5	5	F	Adult onset	Leukodystrophy HP:0002415, Hyperintensity of cerebral white matter on MRI HP:0030890, T2 hyperintense cerebellar lesion HP:6000416, Cerebellar atrophy HP:0001272, Inability to walk HP:0002540	GS	chr5-126,489,209-126,759,255 DEL (GRAMD2B, ALDH7A1, PHAX, TEX43)	chr5-126,489,209-126,759,255 DEL	Deletion	Het (NA)	P (1A, 2A, 3A, 4F)	Leukodystrophy, demyelinating, adult-onset, autosomal dominant, typical (MIM: 169500)
6	6	M	Infantile onset	Hypotonia HP:0001252, Intellectual disability HP:0001249, Seizure HP:0001250 , Peripheral neuropathy HP:0009830, Muscle weakness HP:0001324, Tapered finger HP:0001182, Oculomotor apraxia HP:0000657	GS	ADPRHL2 (NM_017825.3):c.235A>C (p.Thr79Pro)	chr15-75451423 C>G	Missense	Hom	P (PM2, PM5, PM3, PP3)	Neurodegeneration, childhood-onset, stress-induced, with variable ataxia and seizures, AR (MIM: 618170)
7	7	M	Childhood onset	Myositis HP:0100614, Muscle spasm HP:0003394	ES	VWA1 (NM_022834.5):c.592del ( p.Leu198Cysfs*8) VWA1(NM_022834.5):c.1088_1091dup ( p.Tyr364*)	chr1-1437443 AC>A chr1-1439536 G>GGCTA	Frameshift Stop gain	Compound Het	LP (PVS1, PM2) P (PVS1, PM2, PM3)	NEURONOPATHY, DISTAL HEREDITARY MOTOR, AUTOSOMAL RECESSIVE 7; HMNR7 (MIM: 619216)
8	8	F	Infantile onset	Seizure HP:0001250, Elevated circulating creatine kinase concentration HP:0003236, Delayed ability to walk HP:0031936, Intellectual disability HP:0001249	ES	NBEA (NM_001385012.1):c.8716G>A (p.Val2906Ile)	chr13-35668422 G>A	Missense	Het (NA)	P (PM2, PP2)	Neurodevelopmental disorder with or without early-onset generalized epilepsy, AD (MIM #619157)
9	9	F	Congenital onset	Intellectual disability HP:0001249, Seizure HP:0001250, Epileptic encephalopathy HP:0200134, Gait ataxia HP:0002066, Cerebellar vermis hypoplasia HP:0001320, Cerebellar atrophy HP:0001272, Coloboma HP:0000589, Abnormality of the lower limb HP:0002814, Hemihypertrophy HP:0001528, Microphthalmia HP:0000568	GS	NAXE (NM_144772.3):c.235A>G (p.Ser79Gly)	chr1-156592153 A>G	Missense	Hom	VUS (PM2)	Encephalopathy, progressive, early- onset, with brain edema and/or leukoencephalopathy, AR (MIM #617186)
10	10	M	Congenital onset	Severe limb shortening HP:0200083, Severe short-limb dwarfism HP:0008890, Pseudoarthrosis HP:0005864, Wormian bones HP:0002645, Recurrent fractures HP:0002757, Short stature HP:0004322, Pathologic fracture HP:0002756, Dentinogenesis imperfecta HP:0000703, Abnormality of bone mineral density HP:0004348, Intellectual disability, mild HP:0001256	ES, RNA-Seq	SEC24D (NM_014822.4):c.2361C>T (p.Asn787=)	chr4-118739165 G>A	Sinonim	Hom	LP (PM2, BP7, PS3)	Cole-Carpenter syndrome 2, AR (MIM #616294)
11	11	M	Infantil onset	Seizure HP:0001250, Generalized-onset seizure HP:0002197, Generalized tonic seizure HP:0010818, Spastic tetraparesis HP:0001285, Global developmental delay HP:0001263, Developmental regression HP:0002376, Autistic behavior HP:0000729, Autism HP:0000717, EEG abnormality HP:0002353	Trio GS	ARHGEF9 (NM_001353921.2):c.1260 A>T (p.Lys420Asn) TMLHE (NM_018196.4):c.730G>C (p.Asp244His) Dual phenotype	chrX-63655555 T>A chrX-155511701 C>G	Missense Missense	Hem	VUS (PM2, PP3) LP (PM2, PP3)	Developmental and epileptic encephalopathy 8" (MIM #300607) X-linked Autism, susceptibility to, X-linked 6 (MIM #300872) X-Linked
12	12	F	Childhood onset	Hematuria HP:0000790 Proteinuria HP:0000093 Pericardial effusion HP:0001698 Systemic lupus erythematosus HP:0002725 Pericarditis HP:0001701 Episodic abdominal pain HP:0002574 HP:0002027 Recurrent fever HP:0001954 Avascular necrosis HP:0010885 Failure to thrive HP:0001508	GS	ZNFX1 (NM_021035.3):c.1120C>T (p.Arg374Trp)	chr20-49270692 G>A chr14-104703188 G>A	Missense	Het Het (DN)	VUS
13	13	M	Congenital onset	Hyperuricemia HP:0002149, Elevated circulating hepatic transaminase concentration HP:0002910, Fasting hypoglycemia HP:0003162, Lactic acidosis HP:0003128, Hepatomegaly HP:0002240, Abnormal brainstem MRI signal intensity HP:0012747	ES	G6PC (NM_000151.4):c.247C>T (p.Arg83Cys)	chr17-42903947 C>T	Missense	Hom	P (PM3, PM1, PP2, PM2, PM5, PP3, PP5)	Glycogen storage disease Ia, AR, (#232200)
14	14	M	Neonatal onset	Small for gestational age HP:0001518, Premature birth HP:0001622, Reduced tendon reflexes HP:0001315, Hypotonia HP:0001252, Neonatal hypotonia HP:0001319, Syringomyelia HP:0003396, Strabismus HP:0000486, Hypertelorism HP:0000316	ES	LRP4 (NM_002334.4):c.3388G>A (p.Ala1130Thr)	chr11-46876614 C>T	Missense	Hom	VUS (PM2, PP3)	Myasthenic syndrome, congenital, 17, AR (#616304)
15	2025-01-15	F	Congenital onset	Elbow flexion contracture HP:0002987, Strabismus HP:0000486 , Hypotonia HP:0001252, Hearing impairment HP:0000365, Nystagmus HP:0000639, Global developmental delay HP:0001263, Intellectual disability HP:0001249, Steppage gait HP:0003376	Quartet ES	CASK (NM_001367721.1):c.2285A>G (p.Lys762Arg)	chrX-41534738 T>C	Missense	Het	VUS (PM2, PP2)	Intellectual developmental disorder and microcephaly with pontine and cerebellar hypoplasia” (MIM #300749) X Linked
	2025-02-15	F	Congenital onset	Hypotonia HP:0001252, Nystagmus HP:0000639, Respiratory distress HP:0002098, Strabismus HP:0000486, Horizontal nystagmus HP:0000666, Pulmonary artery atresia HP:0004935	Quartet ES	CASK (NM_001367721.1):c.2285A>G (p.Lys762Arg) MAN1B1 (NM_016219.5):c.1000C>T (p.Arg334Cys)	chrX-41534738 T>C chr9-137101088 C>T	Missense Missense	Hom	VUS (PM2, PP2) Pathogenic (PM2, PM3, PM5, PP3_strong)	“Intellectual developmental disorder and microcephaly with pontine and cerebellar hypoplasia” ( MIM #300749) X Linked “Rafiq syndrome” (MIM #614202) Autosomal recessive
	2025-03-15	M	Congenital onset	Elbow flexion contracture HP:0002987, Hearing impairment HP:0000365	Quartet ES	CASK (NM_001367721.1):c.2285A>G (p.Lys762Arg) MAN1B1 (NM_016219.5):c.1000C>T (p.Arg334Cys)	chrX-41534738 T>C chr9-137101088 C>T	Missense Missense	Het Hom	VUS (PM2, PP2) Pathogenic (PM2, PM3, PM5, PP3_strong)	Intellectual developmental disorder and microcephaly with pontine and cerebellar hypoplasia (#300749) X Linked Rafiq syndrome (MIM #614202) Autosomal recessive
16	16	F	Congenital onset	Hemolytic anemia HP:0001878, Microcephaly HP:0000252, Short stature HP:0004322, Global developmental delay HP:0001263, Cerebral atrophy HP:0002059, Aplasia/Hypoplasia of the corpus callosum HP:0007370, Strabismus HP:0000486, Mitral valve prolapse HP:0001634, Recurrent viral infections HP:0004429, Brachydactyly HP:0001156, Macrodontia HP:0001572	Solo GS, RNA-seq	RNU4ATAC (NR_023343.1):n.48G>A (Non coding exon 1/1) RNU4ATAC (NR_023343.1):n.8C>T (Non coding exon 1/1)	chr2-121530927 G>A chr2-121530887 C>T	Non coding exon Non coding exon	Compound Het	LP (PM2, PM3, PS3, BP7) LP (PM2, PM3, PS3, BP7)	Roifman syndrome (MIM #616651) Autosomal Recessive
17	17	M	Congenital onset	Seizure HP:0001250, Neurodevelopmental delay HP:0012758, Microcephaly HP:0000252, Pectus carinatum HP:0000768, Hypotonia HP:0001252, Global developmental delay HP:0001263, Absent speech HP:0001344, Inability to walk HP:0002540, Feeding difficulties HP:0011968, Narrow forehead HP:0000341, Low anterior hairline HP:0000294, Deeply set eye HP:0000490, Thick eyebrow HP:0000574, Long eyelashes HP:00005…	GS	FGF22 (NM_020637.2):c.17G>A (p.Trp6*)	chr19-639942 G>A	Stop gain	Hom	VUS (PM2, BS2)	This gene has not been previously associated with any disease in OMIM.
18	18	M	Childhood onset	Failure to thrive HP:0001508, Developmental regression HP:0002376, Hypokalemia HP:0002900, Hypochloremia HP:0003113, Hypocalcemia HP:0002901, Hypomagnesemia HP:0002917, Hypoparathyroidism HP:0000829, Proteinuria HP:0000093, Seizure HP:0001250, Increased circulating lactate concentration HP:0002151, Muscle weakness HP:0001324, 2:1 atrioventricular block HP:0034305, Ptosis HP:0000508, Proptosis HP:…	GS	NC_012920.1:m.6325_13988del (chrM:6,325-13,988 DEL)		Deletion	Heteroplasmy	P (1A, 2A-2E, 3A, 4L-4O)	17 Genes and Regions (9 Coding Genes) were deleted on mitochondrial genome.
19	19	F	Congenital onset	Global developmental delay HP:0001263, Delayed speech and language development HP:0000750, Patent ductus arteriosus HP:0001643, Ataxia HP:0001251, Diastasis recti HP:0001540, Microcephaly HP:0000252, Micrognathia HP:0000347, Retrognathia HP:0000278, High palate HP:0000218, Glaucoma HP:0000501, Dysphagia HP:0002015, Patent ductus arteriosus HP:0001643, Diastasis recti HP:0001540, Delayed speech an…	ES	CDK13 (NM_003718.5):c.2579G>A (p.Arg860Gln)	chr7-40047856 G>A	Missense	Het (DN)	P (PM1,PM2,PM6, PM5,PP5,PS4)	Congenital heart defects, dysmorphic facial features, and intellectual developmental disorder (MIM #617360)
20	20	M	Congenital onset	Global developmental delay HP:0001263, Hypotonia HP:0001252, Microcephaly HP:0000252, Autistic behavior HP:0000729, Autism HP:0000717, Seizure HP:0001250, Motor stereotypy HP:0000733, Reduced eye contact HP:0000817, Congenital hip dislocation HP:0001374, Acetabular dysplasia HP:0008807, Abnormal pelvic girdle bone morphology HP:0002644, Alopecia HP:0001596, Alopecia of scalp HP:0002293, Sparse sc…	ES	GTPBP2 (NM_019096.5):c.934_936del (p.Phe312del)	chr6-43624673 TGAA>T	Inframe deletion	Hom	VUS (PM2,PM4)	Jaberi-Elahi syndrome, AR (MIM #617988)
21	21	M	Congenital onset	Seizure HP:0001250, Focal motor seizure HP:0011153, EEG abnormality HP:0002353, Microcephaly HP:0000252, Intellectual disability, severe HP:0010864, Intellectual disability HP:0001249, Cataract HP:0000518, Rhabdomyolysis HP:0003201, Nephropathy HP:0000112, Abnormal basal ganglia morphology HP:0002134, Poor head control HP:0002421, Global developmental delay HP:0001263, Hand clenching HP:0001188, …	ES	MED27 (NM_004269.4):c.839C>T (p.Pro280Leu)	chr9-131860635 G>A	Missense	Hom	VUS (PM2,PP5, PP1, PS3)	Neurodevelopmental disorder with spasticity, cataracts, and cerebellar hypoplasia. AR, (MIM #619286) (PMID: 33443317, 37517035).
22	22	F	Congenital onset	Seizure HP:0001250, Microcephaly HP:0000252, Developmental regression HP:0002376, Intellectual disability HP:0001249, Generalized-onset seizure HP:0002197, Hemangioma HP:0001028, Pachygyria HP:0001302, Global developmental delay HP:0001263, EEG abnormality HP:0002353,	ES	KCNT1 (NM_020822.3) :c.274G>A (p.Val92Ile)	chr9-135750117 G>A	Missense	Het (N/A)	VUS (PM2)	Developmental and epileptic encephalopathy 14, AD (MIM #614959)
23	23	F	Congenital onset	Seizure HP:0001250, Microcephaly HP:0000252, Developmental regression HP:0002376, Intellectual disability HP:0001249Generalized-onset seizure HP:0002197, Pachygyria HP:0001302, Lissencephaly HP:0001339, Global developmental delay HP:0001263, Generalized edema HP:0007430, Coarse facial features HP:0000280, High forehead HP:0000348, Narrow forehead HP:0000341, Hypertelorism HP:0000316, Depressed na…	ES	RPS6KA3 (NM_004586.3): c.716T>G (p.Val239Gly)	chrX-20187886 A>C	Missense	Hem	VUS (PM1,PM2, PP2,PP3)	Coffin-Lowry syndrome, X-linked (MIM #303600) Intellectual developmental disorder, X-linked 19 (MIM #300844)
24	2025-01-24	F	Childhood onset	Seizure HP:0001250, EEG abnormality HP:0002353, Periventricular leukomalacia HP:0006970	Quartet ES	ATP1B4 (NM_001142447.3):c.734C>G (p.Pro245Arg)	chrX-120375543 C>G	Missense	Het (Maternal)	VUS (PM2,PP3)	This gene has not been previously associated with any disease in OMIM.
	2025-02-24	F	Childhood onset	Seizure HP:0001250, EEG abnormality HP:0002353	Quartet ES	ATP1B4 (NM_001142447.3):c.734C>G (p.Pro245Arg)	chrX-120375543 C>G	Missense	Het (NA)	VUS (PM2,PP3)	This gene has not been previously associated with any disease in OMIM.
	2025-03-24	F	Childhood onset	Seizure HP:0001250, EEG abnormality HP:0002353	Quartet ES	ATP1B4 (NM_001142447.3):c.734C>G (p.Pro245Arg)	chrX-120375543 C>G	Missense	Het (NA)	VUS (PM2,PP3)	This gene has not been previously associated with any disease in OMIM.
25	25	F	Infantil onset	Dystonia HP:0001332, Paroxysmal dystonia HP:0002268, Laryngeal dystonia HP:0012049, Limb dystonia HP:0002451, Microcephaly HP:0000252, Feeding difficulties HP:0011968, Abnormal putamen morphology HP:0031982, Caudate atrophy HP:0002340, Thin corpus callosum HP:0033725, Global developmental delay HP:0001263, Failure to thrive HP:0001508, Growth delay HP:0001510, Macroglossia HP:0000158, Cachexia HP…	GS	KIAA0586 (NM_001329943.3):c.38del (p.Lys13Argfs*6)	chr14-58428294 GA>G	Frameshift	Hom	P (PVS1, PM2,PM3, PP5)	Joubert syndrome 23 (MIM #616490)
26	26	F	Infantil onset	Motor regression HP:0033044, Developmental regression HP:0002376, Loss of ambulation HP:0002505, Inability to walk HP:0002540, Gait ataxia HP:0002066, Gait disturbance HP:0001288, Loss of speech HP:0002371, Clonus HP:0002169, Babinski sign HP:0003487, Hyperactive deep tendon reflexes HP:0006801, Spastic paraplegia HP:0001258, Deep cerebral white matter hyperintensities HP:0030892, Abnormal cerebr…	ES	DARS2 (NM_018122.5): c.492+2T>C DARS2 (NM_018122.5):c.228-21_228-20delinsC	chr1-173831632 T>C chr1-173828312 TT>C	Splice site Splice site	Compound Het	P (PVS1, PM2,PM3, PP5) LP (PM2, BP7, PS4, PP5)	Leukoencephalopathy with brain stem and spinal cord involvement and lactate elevation (MIM #611105)
27	27	F	Congenital onset	Short stature HP:0004322, Skeletal dysplasia HP:0002652, Growth delay HP:0001510, Short neck HP:0000470, Abnormal abdomen morphology HP:0001438, Hirsutism HP:0001007, Hyperpigmented nevi HP:0007481, Low anterior hairline HP:0000294, Lumbar hyperlordosis HP:0002938	GS	UTRN (NM_007124.3): c.7653-4A>G UTRN (NM_007124.3): c.1750C>G (p.Arg584Gly)	chr6-144700083 A>G chr6-144447629 C>G	- Missense	Het (maternal) Het (paternal)	VUS (PM2, PM3) VUS (PM2, PM3)	This gene has not been previously associated with any disease in OMIM. However, there are publications reporting that variants in this gene are associated with congenital arthrogryposis, short stature, growth and developmental retardation, various dysmorphic facial features. (PMID:37953324, 25741868, 25428349, 41244983)
28	28	M	Infantil onset	Epileptic spasm HP:0011097, Infantile spasms HP:0012469, Reduced cerebral white matter volume HP:0034295	ES	PLEKHG2 (NM_022835.3): c.610C>T (p.Arg204Trp) PLEKHG2 (NM_022835.3) c.629C>T (p.Pro210Leu)	chr19-39416866 C>T chr19-39416885 C>T	Missense Missense	Compound Het	P (PM3, PP1, PS3, PM2, PP5) VUS (PM2)	Leukodystrophy and acquired microcephaly with or without dystonia (MIM #616763)
29	29	F	Infantil onset	Neurodevelopmental delay HP:0012758, Absent speech HP:0001344, Motor delay HP:0001270,	ES	NEB (NM_001164508.2): c.6075+2dup	chr2-151659062 T>TA	Splice site region variant	Hom	VUS (PM2,PP3)	Arthrogryposis multiplex congenita 6 (MIM #619334) Nemaline myopathy 2, autosomal recessive (MIM #256030)
30	30	M	Childhood onset	Developmental regression HP:0002376, Seizure HP:0001250, Optic atrophy HP:0000648	Trio GS	CACNA1I (NM_021096.4): c.2129T>C (p.Ile710Thr) GUCY2D (NM_000180.4): c.1343C>A (p.Ser448*)	chr22-39658288 T>C chr17-8006679 C>A	Missense Stop gain	Het (maternal) Hom	VUS (PM2, PP2, PP3) P (PVS1, PM2, PS4, PP5)	Neurodevelopmental disorder with speech impairment and with ot without seizures (MIM #620114) Cone-rod dystrophy 6 (MIM #601777)
31	31	M	Childhood onset	Strabismus HP:0000486, Scoliosis HP:0002650, Peripheral neuropathy HP:0009830, Demyelinating peripheral neuropathy HP:0007108, Ataxia HP:0001251, Developmental cataract HP:0000519, Intellectual disability HP:0001249, Developmental regression HP:0002376, Absent speech HP:0001344, Inability to walk HP:0002540,	ES	TDP1 (NM_018319.4): c.1317G>A (p.Leu439=)	chr14-89989090 G>A	Splice site variant	Hom	VUS (PM2,PP3)	Spinocerebellar ataxia, autosomal recessive, with axonal neuropathy 1 (MIM #607250)
32	32	M	Adult onset	Chronic kidney disease HP:0012622, Hearing impairment HP:0000365, Sensorineural hearing impairment HP:0000407, Intellectual disability, mild HP:0001256, Arthralgia HP:0002829, Polyneuropathy HP:0001271, Sensorimotor neuropathy HP:0007141, Neuropathic pain HP:6000040, Proteinuria HP:0000093, Renal tubular dysfunction HP:0000124, Leukopenia HP:0001882, Gait disturbance HP:0001288, Ataxia HP:0001251…	Solo GS	FGA (NM_000508.5): c.2552A>G (p.Tyr851Cys)	chr4-154584173 T>C	Missense	Het (NA)	VUS (PM2,PP3)	Amyloidosis, hereditary systemic 2 (MIM #105200)
33	33	F	Adult onset	Spastic tetraplegia HP:0002510 Bradylalia HP:5200038 Gait imbalance HP:0002141 Ataxia HP:0001251 Muscle spasm HP:0003394 Cold intolerance HP:6000855 Dysarthria HP:0001260 Dysmetria HP:0001310 Hyperactive deep tendon reflexes HP:0006801 Hyperreflexia HP:0001347 Babinski sign HP:0003487 Hoffmann sign HP:0031993 Clonus HP:0002169 Abnormal pyramidal sign HP:0007256 Upper motor neuron dysfunction HP:0…	ES	NEFH (NM_021076.4): c.29T>C (p.Leu10Pro)	chr22-29480291 T>C	Missense	Het (NA)	VUS (PM2)	Amyotrophic lateral sclerosis, susceptibility to (MIM #105400)
34	34	F	Infantile onset	Hypotonia HP:0001252, Motor delay HP:0001270, Dysphagia HP:0002015	ES	IFIH1 (NM_022168.4): c.2465G>A (p.Arg822Gln)	chr2-162272377 C>T	Missense	Het (NA)	P (PS4, PP1, PS3, PM2, PM5, PP3, PM1, PP5)	Singleton-Merten syndrome 1 (MIM #606951)
35	35	M	Congenital onset	Hypotonia HP:0001252, Ventricular septal defect HP:0001629, Global developmental delay HP:0001263, Dandy-Walker malformation HP:0001305, Hydrocephalus HP:0000238, Hematochezia HP:0002573, Coarse facial features HP:0000280, Retrognathia HP:0000278, High palate HP:0000218, Microcephaly HP:0000252, Thin corpus callosum HP:0033725	ES, RNA-seq	PEX16 (NM_004813.4):c.111A>G (p.Ala37=)	chr11-45917701 T>C	Splice site variant	Hom	LP (PM2,PP3,PS3)	Peroxisome biogenesis disorder 8B (MIM #614877)
36	36	M	Neonatal onset	Seizure HP:0001250, Ataxia HP:0001251, Global developmental delay HP:0001263, Hypertension HP:0000822, Nephropathy HP:0000112, Hearing impairment HP:0000365, Sensorineural hearing impairment HP:0000407, Congenital sensorineural hearing impairment HP:0008527, Gait imbalance HP:0002141, Tip-toe gait HP:0030051, Dysarthria HP:0001260, Bradylalia HP:5200038, Abnormal diffusion weighted cerebral MRI m…	Trio GS	MRPL49(NM_004927.4): c.262C>T (p.Arg88Cys)	chr11-65125520 C>T	Missense	Hom	LP (PM2, PP3, PP5)	Combined oxidative phosphorylation deficiency 60 (MIM #621195)
37	37	F	Neonatal onset	Respiratory failure HP:0002878 , Respiratory insufficiency HP:0002093 , Respiratory failure requiring assisted ventilation HP:0004887 , Myopathy HP:0003198 , Apnea HP:0002104 , Severe global developmental delay HP:0011344 , Global developmental delay HP:0001263 , Multiple joint contractures HP:0002828	Trio GS	ACTA1 (NM_001100.4): c.211T>A (p.Tyr71Asn)	chr1-229432799 A>T	Missense	Het (DN)	P (PM1,PM2,PP2,PP3,PS2)	Myopathy, scapulohumeroperoneal, AD (MIM #616852) Congenital myopathy 2A, typical, AD (MIM #161800) Congenital myopathy 2B, severe infantile, AD (MIM #620265) Congenital myopathy 2C, severe infantile, AD (MIM #620265)
38	38	M	Infantil onset	Hypotonia HP:0001252 , Seizure HP:0001250 , Involuntary movements HP:0004305 , Episodic vomiting HP:0002572 , Vomiting HP:0002013 , Hypokalemic hypochloremic metabolic alkalosis HP:0004909 , Global developmental delay HP:0001263 , Neurodevelopmental delay HP:0012758 , Motor stereotypy HP:0000733 , Chorea HP:0002072 , Axial hypotonia HP:0008936 , Reduced leukocyte arylsulfatase A activity HP:00348…	Trio GS	SUOX (NM_001032386.2): c.326T>C (p.Phe109Ser)	chr12-56003715 T>C	Missense	Hom	VUS (PM2,PP3)	Sulfite oxidase deficiency, AD (MIM #272300)
39	39	F	Neonatal onset	Abnormal hepatic glycogen storage HP:0500030 , Hepatomegaly HP:0002240 , Anemia HP:0001903 , Decreased total neutrophil count HP:0001875	GS	SLC37A4 (NM_001164277.2):c.1179G>A (p.Trp393*)	chr11-119025021 C>T	Stop gain	Hom	P (PVS1, PM3, PM2, PP5)	Glycogen storage disease Ib (MIM #232220)
40	40	F	Neonatal onset	Neurodevelopmental delay HP:0012758 , Postnatal growth retardation HP:0008897 , Hyperintensity of MRI T2 signal of the spinal cord HP:0040272 , Hyperintensity of cerebral white matter on MRI HP:0030890 , EEG abnormality HP:0002353 , Intellectual disability HP:0001249 , Neonatal hypotonia HP:0001319 ,	Trio GS	TRMT1 (NM_001136035.4):c.1332_1333del (p.Tyr445Leufs*28)	chr19-13109444 TAC>T	Frameshift	Hom	P (PVS1,PM2,PM3,PP1,PP5)	Intellectual developmental disorder, autosomal recessive 68 (MIM #618302)
41	41	M	Childhood onset	Acute hepatic failure HP:0006554 , Acute hepatitis HP:0200119 ,	Trio GS	SCYL1 (NM_020680.4): c.2011del (p.Gln671Lysfs*2)	chr11-65537858 GC>G	Frameshift	Hom	LP (PVS1,PM2)	Spinocerebellar ataxia, autosomal recessive 21 (MIM #616719)
42	42	M	Childhood onset	Elevated circulating creatine kinase concentration HP:0003236 , Myopathy HP:0003198 , Growth delay HP:0001510 , Clumsiness HP:0002312 , Gait ataxia HP:0002066 , Increased circulating lactate dehydrogenase concentration HP:0025435 ,	Trio GS	TET3 (NM_001287491.2):c.2567G>A (p.Arg856Gln)	chr2-74073621 G>A	Missense	Het (DN)	LP (PM2, PS2)	Beck-Fahrner syndrome AD,AR (MIM #618798)
43	43	M	Congenital onset	Hypotonia HP:0001252 , Strabismus HP:0000486 , Neurodevelopmental delay HP:0012758 , Growth delay HP:0001510 , Short stature HP:0004322 , Lower limb spasticity HP:0002061 , Spasticity HP:0001257 , Hyperintensity of cerebral white matter on MRI HP:0030890 , Cerebellar atrophy HP:0001272 , Cerebral atrophy HP:0002059 ,	Trio GS	CASK (NM_001367721.1):chrX:41772635-41895004	chrX:41772635-41895004	Deletion	Hemi (DN)	LP (2E-4L)	Intellectual developmental disorder and microcephaly with pontine and cerebellar hypoplasia (MIM #300749)
44	44	F	Infantile onset	Moyamoya phenomenon HP:0011834 , Renal artery stenosis HP:0001920 , Intellectual disability HP:0001249 , Microcephaly HP:0000252 , Stroke HP:0001297 , Renal cortical cysts HP:0000803 , Cardiomyopathy HP:0001638 , Brachydactyly HP:0001156 , Syndactyly HP:0001159 , Scoliosis HP:0002650 , Kyphosis HP:0002808 , Short metatarsal HP:0010743 , Clinodactyly of the 5th finger HP:0004209 , Short distal pha…	Trio GS	RNF213 (NM_001256071.3):c.12341C>G (p.Thr4114Arg)	chr17-80369783 C>G	Missense	Het (DN)	LP (PM1,PM2, PM5,PS2)	Moyamoya disease 2, susceptibility to AD, AR (MIM #607151)
45	45	F	Childhood onset	Macrocephaly HP:0000256, Specific learning disability HP:0001328	ES	RAF1 (NM_002880.4):c.1624A>G (p.Met542Val)	chr3-12585166 T>C	Missense	Het (NA)	VUS (PM2)	Noonan syndrome 5 (MIM #611553)
46	46	F	Neonatal onset	Microcephaly HP:0000252 , Rocker bottom foot HP:0001838 , Hypertonia HP:0001276 , Global developmental delay HP:0001263 , Motor delay HP:0001270 , Neurodevelopmental delay HP:0012758 , Seizure HP:0001250 , Oculomotor apraxia HP:0000657 , Ventriculomegaly HP:0002119 , Poor head control HP:0002421 , Neck muscle weakness HP:0000467 , Delayed myelination HP:0012448 , Generalized hypotonia HP:0001290 …	Trio ES	SLC25A1 (NM_005984.5):c.202+5G>A	chr22-19178128 C>T	Splice Site Region	Hom	VUS (PM2, PP3)	Combined D-2 and L-2 hydroxyglutaric aciduria, AR (MIM #615182) Myasthenic syndrome, congenital, 23, presynaptic, AR (MIM #618197)
47	47	M	Infantile onset	Neurodevelopmental delay HP:0012758 , Global developmental delay HP:0001263 , Sparse hair HP:0008070 , Intellectual disability HP:0001249 , Absent speech HP:0001344 , Strabismus HP:0000486 , Poor head control HP:0002421 , Spasticity HP:0001257 , Broad thumb HP:0011304 , Feeding difficulties HP:0011968 , Inability to walk HP:0002540 , Narrow mouth HP:0000160 , Hypotonia HP:0001252	ES	KDM2B (NM_032590.5):c.3703C>T (p.Arg1235Cys)	chr12-121439983 G>A	Missense	HET (DN)	VUS (PM2, PP2, PP3)	This gene has not been previously associated with any disease in OMIM. However, there are publications reporting that variants in this gene are associated with neurodevelopmental syndrome (PMID: 40420380,36322151).
48	48.1	M	Childhood onset	Complex febrile seizure HP:0011172, EEG abnormality HP:0002353	ES	BSN (NM_003458.4):c.3378C>G (p.Tyr1126*)	chr3-49652934 C>G	Stop gain	Het (paternal)	LP (PVS1, PM2)	This gene has not been previously associated with any disease in OMIM. However, there are publications reporting that variants in this gene are associated with epilepsy and neurodevelopmental syndrome (PMID: 36600631, 40393460, 39990563).
	48.2	M	Childhood onset	Complex febrile seizure HP:0011172, EEG abnormality HP:0002353	ES	BSN (NM_003458.4):c.3378C>G (p.Tyr1126*)	chr3-49652934 C>G	Stop gain	Het (paternal)	LP (PVS1, PM2)	This gene has not been previously associated with any disease in OMIM. However, there are publications reporting that variants in this gene are associated with epilepsy and neurodevelopmental syndrome (PMID: 36600631, 40393460, 39990563).
49	49	F	Juvenile onset	Autistic behavior HP:0000729, Seizure HP:0001250	ES	SLC6A1 (NM_003042.4):c.1648G>A (p.Gly550Arg)	chr3-11034651 G>A	Missense	Het (NA)	P (PS1,PS3,PM2,PP2,PP3,PP5)	Myoclonic-Atonic Epilepsy Otosomal Dominant (MIM #616421)
50	50	F	Congenital onset	Developmental cataract HP:0000519, Glaucoma HP:0000501, Motor delay HP:0001270, Inability to walk HP:0002540	ES	LRP1 ( NM_002332.3):c.9845A>G (p.His3282Arg)	chr12-57199380 A>G	Missense	Hom	VUS (PM2, PP2, PP3)	This gene has not been previously associated with any disease in OMIM. However, there are publications reporting that variants in this gene are associated with congenital cataract and motor delay (PMID: 36307211).
51	51	M	Congenital onset	Global developmental delay HP:0001263, EEG abnormality HP:0002353, Seizure HP:0001250, Motor delay HP:0001270, Absent speech HP:0001344, Inability to walk HP:0002540, Corneal dystrophy HP:0001131, Hypotonia HP:0001252, Microcephaly HP:0000252, Highly arched eyebrow HP:0002553, Prominent eyelashes HP:0011231, Absent speech HP:0001344, Poor head control HP:0002421	GS, RNA-seq	CHKA (NM_001277.3):c.630G>C (p.Pro210=)	chr11-68074717 C>G	Splice site region variant	Hom	LP (PM2,PP3,PS3)	Neurodevelopmental disorder with microcephaly, movement abnormalities, and seizures (MIM #620023)
52	52	M	Neonatal onset	Lactic acidosis HP:0003128, Hyperammonemia HP:0001987, Abnormality of the liver HP:0001392	Trio GS	MMAB (NM_052845.4):c.580A>G (p.Arg194Gly)	chr12-109561044 T>C	Missense	Hom	P (PM1,PM2,PM3, PM5, PP2,PP3,PP5)	Methylmalonic aciduria, vitamin B12-responsive, cblB type, Autosomal Recessive, (MIM #251110)
53	53	F	Congenital onset	Diabetes insipidus HP:0000873, Central diabetes insipidus HP:0000863, Holoprosencephaly HP:0001360, Semilobar holoprosencephaly HP:0002507, Seizure HP:0001250, Refractory status epilepticus HP:0032867, Status epilepticus HP:0002133, Global developmental delay HP:0001263, Microcephaly HP:0000252, Primary microcephaly HP:0011451, Depressed nasal bridge HP:0005280, Anteverted nares HP:0000463, Hypot…	Trio GS	SMC1A (NM_006306.4):c.2420+5G>A	chrX-53403561 C>T	Splice site region variant	Het (DN)	VUS (PM2, PP3)	Developmental and epileptic encephalopathy 85, with or without midline brain defects, XLD (MIM:301044) Cornelia de Lange syndrome 2, XLD (MIM #300590)
54	54	M	Infantile onset	Neurodevelopmental delay HP:0012758, Hypotonia HP:0001252, Seizure HP:0001250, Hepatosplenomegaly HP:0001433, Visual loss HP:0000572, Hearing impairment HP:0000365, Hypoplasia of the corpus callosum HP:0002079, Subdural hemorrhage HP:0100309	Trio GS	GBA (NM_000157.4):c.1448T>C (p.Leu483Pro) GBA (NM_000157.4):c.721G>A (p.Gly241Arg)	chr1-155235252 A>G chr1-155238174 C>T	Missense Missense	Compound Het	P ( PM3, PS3, PS2, PM1, PP2, PM5, PP3) P( PM3, PP1, PS3, PM1, PP2, PM2, PM5, PP3)	Gaucher Disease, Type II; GD2 (MIM # 230900)
55	55	M	Childhood onset	Delayed speech and language development HP:0000750, Autism HP:0000717, Autistic behavior HP:0000729, Reduced eye contact HP:0000817, Aggressive behavior HP:0000718, Attention deficit hyperactivity disorder HP:0007018, Abnormal nonverbal communicative behavior HP:0000758, Motor stereotypy HP:0000733	Trio GS	NLGN4X (NM_181332.3): c.1182C>T ( p.Asp394= )	chrX-5903496 G>A	Synonymous	Hemi (maternal)	VUS ( PM2, BP7)	Autism susceptibility, X-linked 2 ( MIM # 300495 )
56	56	F	Neonatal onset	HP:0001250Seizure, HP:0002376Developmental regression, HP:0001263Global developmental delay, HP:0001257 Spasticity, HP:0001344 Absent speech, HP:0000341 Narrow forehead, HP:0000687 Widely spaced teeth, HP:0009748 Large earlobe	Trio GS	POMT1 (NM_001077365.2): c.280+1G>T POMT1 (NM_001077365.2): c.2039T>C (p.Val680Ala )	chr9-131506454 G>T chr9-131522967 T>C	Splice site region variant Missense	Compound Het Compound Het	P(PM3, PM2, PVS1, PP5) VUS (PM2, PM3)	Muscular dystrophy-dystroglycanopathy (congenital with impaired intellectual development), type B, 1 (MIM: 613155)
57	57	M	Infantile onset	Neurodevelopmental delay HP:0012758, Seizure HP:0001250, Motor delay HP:0001270, Wide mouth HP:0000154, Strabismus HP:0000486, Hyperreflexia HP:0001347, Lower limb spasticity HP:0002061, Hyperglycinemia HP:0002154, Nonketotic hyperglycinemia HP:0008288	ES	AMT (NM_000481.4) :c.91-19T>G	chr3-49422290 A>C	Splice site region variant	Hom	VUS (PP1, PP4, PM2)	Glycine encephalopathy 2, AR ( MIM # 620398)
58	58	F	Infantile onset	Neurodevelopmental delay HP:0012758, Hypotonia HP:0001252, Absent speech HP:0001344, Inability to walk HP:0002540, Long palpebral fissure HP:0000637, Anteverted nares HP:0000463, Thin upper lip vermilion HP:0000219, Wide mouth HP:0000154, Large fleshy ears HP:0002265, Posteriorly rotated ears HP:0000358, Abnormal elasticity of skin HP:0010647	Trio ES	PGAP1 ( NM_024989.4 ) :c.649+5G>A	chr2-196912877 C>T	Splice site region variant	Hom	VUS (PP3, PP4, PM2)	Neurodevelopmental disorder with dysmorphic features, spasticity, and brain abnormalities, AR (MIM #615802)
59	59	F	Neonatal onset	Neurodevelopmental delay HP:0012758, Seizure HP:0001250, Premature birth HP:0001622, Intellectual disability HP:0001249, Motor delay HP:0001270, Intrauterine growth retardation HP:0001511	Trio GS	BCL11A (NM_022893.4):c.1417G>T (p.Glu473*)	chr2-60461495 C>A	Stop gain	Het (DN)	P (PS4, PVS1, PM2)	Dias-Logan syndrome, AD (MIM #617101)
60	60	M	Childhood onset	Elevated circulating hepatic transaminase concentration HP:0002910, Hepatic failure HP:0001399, Elevated circulating alanine aminotransferase concentration HP:0031964, Hepatomegaly HP:0002240, Cafe-au-lait spot HP:0000957, Microretrognathia HP:0000308, Hepatic steatosis HP:0001397	Trio GS	PHKG1 (NM_006213.5):c.446G>A (p.Arg149Gln)	chr7-56083379 C>T	Missense	Hom	VUS (PM2)	PHKG1 gene has not been previously associated with any disease in OMIM.
61	61	F	Juvenile onset	Ataxia HP:0001251, Trigeminal anesthesia HP:0031912, Abnormality of the twelfth cranial nerve HP:0010826	ES	ATP5F1A (NM_004046.6 ):c.1214G>A (p.Arg405His)	chr18-46086457 C>T	Missense	Het (NA)	VUS (PM2, PP3)	Mitochondrial complex V (ATP synthase) deficiency, nuclear type 4A, AD (MIM #620358)
62	62	F	Childhood onset	Seizure HP:0001250, Cerebral palsy HP:0100021, Tetraparesis HP:0002273, Craniosynostosis HP:0001363, Developmental regression HP:0002376, Cerebellar atrophy HP:0001272, Atrophy/Degeneration affecting the brainstem HP:0007366, Cerebral atrophy HP:0002059, Gliosis HP:0002171, Periventricular leukomalacia HP:0006970, Thin corpus callosum HP:0033725, Ventriculomegaly HP:0002119, EEG abnormality HP:00…	Trio GS	CNTN1(NM_001843.4):c.703+1G>A DEL:chr12:41.021.576-41.040.185	chr12-40930003 G>A chr12:41.021.576-41.040.185	Splice site region variant Deletion (18.6kb)	Compound Het	LP (PVS1, PM2) LP (2E)	Congenital myopathy 12, AR (MIM #612540)
63	63	M	Childhood onset	Abnormality of movement HP:0100022, Hyperkinetic movements HP:0002487, Atypical behavior HP:0000708	ES	WFS1(NM_006005.3):c.2020G>A (p.Gly674Arg) WFS1(NM_006005.3):c.1808T>G (p.Val603Gly)	chr4-6301815 G>A chr4-6301603 T>G	Missense Missense	Compound Het	P (PM2, PM5, PS4, PP3) VUS (PM2)	Wolfram syndrome 1 , AR (MIM #222300) Wolfram-like syndrome, autosomal dominant (MIM #614296)
AD: Autosomal Dominant, AR: Autosomal Recessive, DN: De Novo, NA: Non Available

## Sheet: Supplementary Table 2
Supplementary Table 2. Comprehensive annotation of all identified P/LP and clinically relevant VUSs in the study cohort
Family ID	Patient ID	Input	Gene	Consequence	HGVSc	HGVSp	Transcript	ACMG_Class	ACMG_Criteria	ACMG_Score	ClinVar_Sig	ClinVar_Disease	ClinVar_Review	AF_gnomAD_Genome	AF_gnomAD_Exome	CADD_Phred	SpliceAI	SpliceAI_Pred	revel_score	revel_prediction	alphamissense_score	alphamissense_prediction	bayesdelnoaf_score	bayesdelnoaf_prediction	VEST4	PhyloP100	GERP
1	1	chr1-241959054 CAA>C	BECN2	frameshift_variant	c.1291_1292delAA	p.Lys431fs	ENST00000419583.2	Uncertain_significance	PM2	2							0	Benign		None		None		None		4.774
		chr1-225424033 G>A	LBR	stop_gained	c.43C>T	p.Arg15*	ENST00000272163.9	Pathogenic	PVS1,PP5_Moderate	10	Pathogenic	not provided	criteria provided, single submitter	328792	119329	40	0	Benign		None		None	0.65	Pathogenic	[0.854, 0.854]	8.527	5.51
		chr7-107672230 T>A	SLC26A4	missense_variant	c.397T>A	p.Ser133Thr	ENST00000644269.2	Pathogenic	PM1,PM2,PM5,PP2,PP3_Strong,PP5_Very_Strong	19	Likely pathogenic;Pathogenic	Autosomal recessive nonsyndromic hearing loss 4,Pendred syndrome,not provided	criteria provided, single submitter		278698	2026-07-26	0	Benign	0.934	Pathogenic	0.4642	None	0.49	Pathogenic	988	7.487	2026-12-05
2	2026-01-02	chr1-6825194 G>T	CAMTA1	missense_variant	c.218G>T	p.Arg73Leu	ENST00000303635.12	Uncertain_significance	PM2,PP3_Moderate	4						33	0	Benign	0.575	Uncertain_significance	0.9822	None	0.16	Pathogenic	[0.906, 0.919, 0.917, 0.89]	9.82	5.95
	2026-02-02	chr1-6825194 G>T	CAMTA1	missense_variant	c.218G>T	p.Arg73Leu	ENST00000303635.12	Uncertain_significance	PM2,PP3_Moderate	4						33	0	Benign	0.575	Uncertain_significance	0.9822	None	0.16	Pathogenic	[0.906, 0.919, 0.917, 0.89]	9.82	5.95
3	3	chr3-4693669 G>T	ITPR1	missense_variant	c.4209G>T	p.Glu1403Asp	ENST00000649015.2	Uncertain_significance	PM2,PP3_Moderate	4	Uncertain significance	Spinocerebellar ataxia type 29	criteria provided, single submitter			2026-07-26	0.06	Benign	575	Uncertain_significance	9.822	None	0.16	Pathogenic	[0.913, 0.908, 0.909, 0.882]	3.942	4.29
4	4	chr15-75451423 C>G	SIN3A	splice_region_variant	c.-34G>C		ENST00000394947.8	Uncertain_significance	PM2,PP3_Moderate	4							0.3	Uncertain_significance	0.874	Pathogenic	0.9995	None	0.46	Pathogenic		3.715
6	6	chr1-36091267 A>C	ADPRHL2	missense_variant	c.235A>C	p.Thr79Pro	ENST00000373178.5	Pathogenic	PM2,PP3_Strong,PP5_Very_Strong	14	Pathogenic/Likely pathogenic	childhood-onset, stress-induced, with variable ataxia and seizures,Neurodegeneration	criteria provided, multiple submitters, no conflicts		6.84077e-07		0.01	Benign	0.788	Pathogenic	0.9715	Pathogenic	0.23	Pathogenic		9.03
7	7	chr1-1437443 AC>A	VWA1	frameshift_variant	c.592delC	p.Leu198fs	ENST00000476993.2	Likely_pathogenic	PVS1_Strong,PM2	6							0.02	Benign		None		None		None		0.921
7	7	chr1-1439536 G>GGCTA	VWA1	frameshift_variant	c.1088_1091dupGCTA	p.Tyr364fs	ENST00000476993.2	Pathogenic	PVS1_Strong,PM2,PP5_Very_Strong	14	Likely pathogenic;Pathogenic	autosomal recessive 7, distal hereditary motor,Neuronopathy,not provided	criteria provided, multiple submitters, no conflicts					None		None		None		None		1.152
8	8	chr13-35668422 G>A	NBEA	missense_variant	c.8716G>A	p.Val2906Ile	ENST00000379939.7	Uncertain_significance	PM2,BP4_Moderate	0					806712	2026-05-24	0.02	Benign	0.191	Benign	0.0792	None	-0.34	Benign	[0.47, 0.427, 0.44, 0.484, 0.562, 0.497]	9.827	5.91
9	9	chr1-156592153 A>G	NAXE	missense_variant	c.235A>G	p.Ser79Gly	ENST00000368235.8	Uncertain_significance	PM2	2					397662	2026-02-28	0	Benign	364	Uncertain_significance	4654	None	-0.13	Benign	[0.629, 0.583, 0.588]	7.181	4.57
10	10	chr4-118739165 G>A	SEC24D	synonymous_variant	c.2361C>T	p.Asn787Asn	ENST00000280551.11	Likely_benign	PM2,BP4_Moderate,BP7	-1							0.1	Benign		None		None	-0.35	Benign		2.481
11	11	chrX-63655555 T>A	ARHGEF9	missense_variant	c.1260A>T	p.Lys420Asn	ENST00000671741.2	Uncertain_significance	PM2,PP3_Moderate	4						2026-07-22	0	Benign	0.846	Pathogenic	0.9953	None	0.13	Uncertain_significance	[0.795, 0.784, 0.782, 0.803, 0.79, 0.8, 0.798, 0.809]	768	3.48
		chrX-155511701 C>G	TMLHE	missense_variant	c.730G>C	p.Asp244His	ENST00000334398.8	Likely_pathogenic	PM2,PP3_Strong	6	risk factor	Epsilon-trimethyllysine hydroxylase deficiency	no assertion criteria provided			2026-02-26	0.01	Benign	0.951	Pathogenic	0.9971	None	0.71	Pathogenic	[0.994, 0.973]	6.783	3.64
12	12	chr20-49270692 G>A	ZNFX1	missense_variant	c.1120C>T	p.Arg374Trp	ENST00000396105.6	Uncertain_significance	PM2,PP3_Moderate	4					79533	31	0	Benign	0.837	Pathogenic	0.5651	None	0.47	Pathogenic	[0.859, 0.885, 0.873]	6.673	2026-09-03
13	13	chr17-42903947 C>T	G6PC1	missense_variant	c.247C>T	p.Arg83Cys	ENST00000253801.7	Pathogenic	PM1,PM5,PP2,PP3,PP5_Very_Strong,BP4	13	Pathogenic	type I,Glycogen storage disease,Glycogen storage disease due to glucose-6-phosphatase deficiency type IA,Hypoglycemia,Short stature,not provided,not specified	criteria provided, single submitter;criteria provided, multiple submitters, no conflicts	348395	572674	2026-03-29	0	Benign	0.829	Pathogenic	0.9363	None	0.5	Pathogenic	[0.969, 0.981, 0.986]	2.666	4.93
14	14	chr11-46876614 C>T	LRP4	missense_variant	c.3388G>A	p.Ala1130Thr	ENST00000378623.6	Uncertain_significance	PM2	2	Uncertain significance	Cenani-Lenz syndactyly syndrome,Congenital myasthenic syndrome 17,Sclerosteosis 2	criteria provided, single submitter	394254	319343	2026-04-23	0	Benign	0.691	Pathogenic	0.1472	Benign	0.05	Uncertain_significance	367	6.161	4.32
15	2026-01-15	chrX-41534738 T>C	CASK	missense_variant	c.2285A>G	p.Lys762Arg	ENST00000378163.7	Uncertain_significance	PM2,BP4	1						2026-05-23	0	Benign	0.23	Benign	0.0954	None	-0.34	Benign	662	7.674	5.34
	2026-02-15	chrX-41534738 T>C	CASK	missense_variant	c.2285A>G	p.Lys762Arg	ENST00000378163.7	Uncertain_significance	PM2,BP4	1						2026-05-23	0	Benign	0.23	Benign	0.0954	None	-0.34	Benign	662	7.674	5.34
		chr9-137101088 C>T	MAN1B1	missense_variant	c.1000C>T	p.Arg334Cys	ENST00000371589.9	Likely_pathogenic	PM2,PM5,PP3_Strong,PP5	9	Pathogenic	Inborn genetic diseases,MAN1B1-related disorder,Rafiq syndrome,See cases,not provided	criteria provided, single submitter;criteria provided, multiple submitters, no conflicts	591382	357938	33	0	Benign	0.956	Pathogenic	0.912	None	0.43	Pathogenic	[0.998, 0.999]	7.676	5.65
	2026-03-15	chrX-41534738 T>C	CASK	missense_variant	c.2285A>G	p.Lys762Arg	ENST00000378163.7	Uncertain_significance	PM2,BP4	1						2026-05-23	0	Benign	0.23	Benign	0.0954	None	-0.34	Benign	662	7.674	5.34
		chr9-137101088 C>T	MAN1B1	missense_variant	c.1000C>T	p.Arg334Cys	ENST00000371589.9	Likely_pathogenic	PM2,PM5,PP3_Strong,PP5	9	Pathogenic	Inborn genetic diseases,MAN1B1-related disorder,Rafiq syndrome,See cases,not provided	criteria provided, single submitter;criteria provided, multiple submitters, no conflicts	591382	357938	33	0	Benign	0.956	Pathogenic	0.912	None	0.43	Pathogenic	[0.998, 0.999]	7.676	5.65
16	16	chr2-121530927 G>A	RNU4ATAC	intron_variant	c.196-602C>T		ENST00000696935.1	Likely_pathogenic	PP5_Very_Strong,BP4,BS2_Supporting	6	Pathogenic/Likely pathogenic;Likely pathogenic;no classifications from unflagged records	type 1,Lowry-Wood syndrome,Osteodysplastic primordial dwarfism,RNU4ATAC-related spliceosomopathies,Roifman syndrome,not provided	no classifications from unflagged records;no assertion criteria provided;criteria provided, single submitter;criteria provided, multiple submitters, no conflicts	525679	45977		0	Benign		None		None	-0.24	Benign		9.433
		chr2-121530887 C>T	RNU4ATAC	intron_variant	c.196-562G>A		ENST00000696935.1	Likely_benign	PP5,BP4,BS2_Supporting	-1	Pathogenic/Likely pathogenic;Likely pathogenic;Uncertain significance	Cardiomyopathy,Craniosynostosis syndrome,Microcephaly,Neurodevelopmental delay,RNU4ATAC-related disorder,Roifman syndrome,Short stature,Spondyloepiphyseal dysplasia congenita,not provided,not specified	criteria provided, single submitter;criteria provided, multiple submitters, no conflicts	394285	385933		0	Benign		None		None	-0.22	Benign		5.735
17	17	chr19-639942 G>A	FGF22	stop_gained	c.17G>A	p.Trp6*	ENST00000215530.7	Likely_benign	BS2	-4				461778	30581	42	0	Benign		None		None	0.28	Pathogenic	[0.53, 0.541]	613	3.42
19	19	chr7-40047856 G>A	CDK13	missense_variant	c.2579G>A	p.Arg860Gln	ENST00000181839.10	Pathogenic	PM1,PM2,PM5,PP3_Moderate,PP5_Very_Strong	16	Pathogenic	not provided	criteria provided, single submitter			34	0	Benign	0.62	Uncertain_significance	0.9983	None	0.23	Pathogenic	[0.817, 0.8, 0.909, 0.922]	9.917	2026-04-05
20	20	chr6-43624673 TGAA>T	GTPBP2	conservative_inframe_deletion	c.934_936delTTC	p.Phe312del	ENST00000307126.10	Uncertain_significance	PM2,PM4_Supporting	3					0		0	Benign		None		None		None		8.897
21	21	chr9-131860635 G>A	MED27	missense_variant	c.839C>T	p.Pro280Leu	ENST00000292035.10	Likely_benign	PP2,BP4_Moderate	-1	Pathogenic;Uncertain significance	and cerebellar hypoplasia, cataracts,Neurodevelopmental disorder with spasticity,not provided	criteria provided, single submitter;no assertion criteria provided	722667	527251	2026-01-24	0	Benign	0.199	Benign	0.3866	None	-0.07	Uncertain_significance	[0.325, 0.316]	6.536	2026-03-05
22	22	chr9-135750117 G>A	KCNT1	missense_variant	c.274G>A	p.Val92Ile	ENST00000371757.7	Likely_benign	BP4,BS2	-5	Uncertain significance	14,Autosomal dominant nocturnal frontal lobe epilepsy 5,Developmental and epileptic encephalopathy,not provided	criteria provided, single submitter;criteria provided, multiple submitters, no conflicts	657324	119598	32	0	Benign	0.157	Benign	0.1884	None	-0.22	Benign	[0.766, 0.699, 0.66, 0.635, 0.723, 0.703, 0.709, 0.706, 0.711, 0.638]	9.631	4.18
23	23	chrX-20187886 A>C	RPS6KA3	missense_variant	c.716T>G	p.Val239Gly	ENST00000379565.9	Likely_pathogenic	PM1,PM2,PP2,PP3_Strong	9						32	0.03	Benign	0.881	Pathogenic	0.9952	None	0.46	Pathogenic	642	9.325	4.76
24	2026-01-24	chrX-120375543 C>G	ATP1B4	missense_variant	c.734C>G	p.Pro245Arg	ENST00000218008.8	Likely_pathogenic	PM2,PP3_Strong	6						2026-04-26	0	Benign	0.776	Pathogenic	0.9952	None	0.4	Pathogenic	[0.979, 0.988, 0.989]	7.505	5.19
	2026-02-24	chrX-120375543 C>G	ATP1B4	missense_variant	c.734C>G	p.Pro245Arg	ENST00000218008.8	Likely_pathogenic	PM2,PP3_Strong	6						2026-04-26	0	Benign	0.776	Pathogenic	0.9952	None	0.4	Pathogenic	[0.979, 0.988, 0.989]	7.505	5.19
	2026-03-24	chrX-120375543 C>G	ATP1B4	missense_variant	c.734C>G	p.Pro245Arg	ENST00000218008.8	Likely_pathogenic	PM2,PP3_Strong	6						2026-04-26	0	Benign	0.776	Pathogenic	0.9952	None	0.4	Pathogenic	[0.979, 0.988, 0.989]	7.505	5.19
25	25	chr14-58428294 GA>G	KIAA0586	frameshift_variant	c.38delA	p.Lys13fs	ENST00000652326.2	Pathogenic	PVS1,PP5_Very_Strong	16	Pathogenic/Likely pathogenic	Inborn genetic diseases,Joubert syndrome 23,Primary ciliary dyskinesia,Short-rib thoracic dysplasia 14 with polydactyly,not provided			171056		0.02	Benign		None		None		None		665
26	26	chr1-173831632 T>C	DARS2	splice_donor_variant	c.492+2T>C		ENST00000649689.2	Pathogenic	PVS1_Moderate,PP5_Very_Strong	10	Pathogenic	10 conditions,Dysmetria,Gait ataxia,Gait imbalance,Inborn genetic diseases,Leukoencephalopathy with brain stem and spinal cord involvement-high lactate syndrome,not provided	criteria provided, single submitter;criteria provided, multiple submitters, no conflicts	315395	33064	2026-06-25	0.99	Pathogenic		None		None	0.28	Pathogenic		5.457	5.77
		chr1-173828312 TT>C	DARS2	intron_variant	c.228-21_228-20delTTinsC		ENST00000649689.2	Pathogenic	PM2,PP5_Very_Strong	10	Pathogenic	10 conditions,Dysmetria,Gait ataxia,Gait imbalance,Leukoencephalopathy with brain stem and spinal cord involvement-high lactate syndrome,not provided								None		None		None		2.506
27	27	chr6-144700083 A>G	UTRN	splice_region_variant	c.7653-4A>G		ENST00000367545.8	Likely_benign	PM2,BP4_Strong	-2					0		0.97	Pathogenic		None		None	-0.73	Benign		0.637
		chr6-144447629 C>G	UTRN	missense_variant	c.1750C>G	p.Arg584Gly	ENST00000367545.8	Uncertain_significance	PM2,PP3	3							0	Benign	0.225	Benign	0.6657	Pathogenic	0.06	Uncertain_significance		5.02
28	28	chr19-39416866 C>T	PLEKHG2	missense_variant	c.610C>T	p.Arg204Trp	ENST00000425673.6	Likely_benign	PP5,BP4,BS2_Supporting	-1	Pathogenic/Likely pathogenic;Conflicting interpretations of pathogenicity;Likely pathogenic	Leukodystrophy and acquired microcephaly with or without dystonia,PLEKHG2-related disorder,not provided	criteria provided, conflicting interpretations;criteria provided, single submitter;criteria provided, multiple submitters, no conflicts	381047	356456	33	0.1	Benign	0.339	Uncertain_significance	0.4323	None	-0.11	Benign	[0.702, 0.894, 0.685]	3.454	4.87
		chr19-39416885 C>T	PLEKHG2	missense_variant	c.629C>T	p.Pro210Leu	ENST00000425673.6	Uncertain_significance		0	Uncertain significance	not provided,not specified	criteria provided, single submitter	656987	20414	2026-05-24	0.13	Benign	0.317	Uncertain_significance	0.2138	None	-0.28	Benign	[0.495, 0.52, 0.435]	0.88	4.87
29	29	chr2-151659062 T>TA	NEB	splice_donor_variant	c.6075+2_6075+3insT		ENST00000397345.8	Uncertain_significance	PVS1_Moderate,PM2	4							0.93	Pathogenic		None		None		None		7.617
30	30	chr22-39658288 T>C	CACNA1I	missense_variant	c.2129T>C	p.Ile710Thr	ENST00000402142.4	Uncertain_significance	PM2,PP3	3						2026-05-23	0	Benign	0.936	Pathogenic	0.7189	None	0.38	Pathogenic	[0.751, 0.762, 0.774, 0.776]	6.167	5.21
		chr17-8006679 C>A	GUCY2D	stop_gained	c.1343C>A	p.Ser448*	ENST00000254854.5	Pathogenic	PVS1,PP4,PM2_Supporting	10	Pathogenic	1, central areolar, congenital stationary, type1i,Choroidal dystrophy,Cone-rod dystrophy 6,GUCY2D-related recessive retinopathy,Leber congenital amaurosis 1,Night blindness,Retinal dystrophy,not provided	reviewed by expert panel;no assertion criteria provided;criteria provided, single submitter;criteria provided, multiple submitters, no conflicts	197083	332989	32	0.03	Benign		None		None	0.05	Uncertain_significance	479	01.05	-6.03
31	31	chr14-89989090 G>A	TDP1	splice_region_variant	c.1317G>A	p.Leu439Leu	ENST00000335725.9	Likely_pathogenic	PM2,PP3_Strong	6				197195	159458		0.66	Pathogenic	0.27	Benign		None	-0.38	Benign		7.079
32	32	chr4-154584173 T>C	FGA	missense_variant	c.2552A>G	p.Tyr851Cys	NM_000508.5	Uncertain_significance	PP3_Moderate	2					159194	2026-04-22	0	Benign	0.935	Pathogenic	0.8031	None	0.34	Pathogenic	822	6.225	5.47
33	33	chr22-29480291 T>C	NEFH	missense_variant	c.29T>C	p.Leu10Pro	ENST00000310624.7	Uncertain_significance	PM2,BP4	1						2026-03-24	0	Benign	0.512	Uncertain_significance	0.3141	Benign	0.07	Uncertain_significance	394	926	3.88
34	34	chr2-162272377 C>T	IFIH1	missense_variant	c.2465G>A	p.Arg822Gln	ENST00000649979.2	Pathogenic	PM1,PM5,PP3_Moderate,PP5_Very_Strong	14	Pathogenic/Likely pathogenic;Pathogenic	Aicardi-Goutieres syndrome 7,IFIH1-related disorder,Inborn genetic diseases,Incidental Discovery,Singleton-Merten syndrome 1,not provided	no assertion criteria provided;criteria provided, single submitter;criteria provided, multiple submitters, no conflicts		280924	2026-07-28	0	Benign	0.981	Pathogenic	0.6497	None	0.59	Pathogenic	991	7.598	5.87
35	35	chr11-45917701 T>C	PEX16	splice_region_variant	c.111A>G	p.Ala37Ala	ENST00000378750.10	Likely_pathogenic	PM2,PP3_Strong	6							0.88	Pathogenic		None		None	-0.28	Benign		6.533
36	36	chr11-65125520 C>T	MRPL49	missense_variant	c.262C>T	p.Arg88Cys	ENST00000279242.7	Pathogenic	PM2,PM5,PP3_Strong,PP5_Very_Strong	16	Likely pathogenic	COMBINED OXIDATIVE PHOSPHORYLATION DEFICIENCY 60,Perrault syndrome 1	no assertion criteria provided	131487	238671	2026-04-26	0	Benign	0.701	Pathogenic	0.6885	None	0.35	Pathogenic	[0.992, 0.979]	7.177	5.86
37	37	chr1-229432799 A>T	ACTA1	missense_variant	c.211T>A	p.Tyr71Asn	ENST00000366684.7	Likely_pathogenic	PM1,PM2,PP2,PP3_Strong	9						2026-07-29	0	Benign	0.968	Pathogenic	0.9678	None	0.48	Pathogenic	[0.895, 0.899]	9.325	4.69
38	38	chr12-56003715 T>C	SUOX	missense_variant	c.326T>C	p.Phe109Ser	ENST00000266971.8	Likely_pathogenic	PM2,PP3_Strong	6						2026-06-27	0	Benign	0.845	Pathogenic	0.9477	None	0.08	Uncertain_significance	[0.566, 0.568, 0.57, 0.573, 0.554]	5.65	2026-01-05
39	39	chr11-119025021 C>T	SLC37A4	stop_gained	c.1179G>A	p.Trp393*	ENST00000330775.9	Pathogenic	PVS1_Strong,PP5_Very_Strong	12	Pathogenic	Glucose-6-phosphate transport defect	criteria provided, multiple submitters, no conflicts		160503	42	0.01	Benign	0.158	Benign	0.1491	Benign	-0.11	Benign	375	7.177	5.27
40	40	chr19-13109444 TAC>T	TRMT1	frameshift_variant	c.1332_1333delGT	p.Tyr445fs	ENST00000357720.9	Pathogenic	PVS1,PP5_Very_Strong	16	Pathogenic	autosomal recessive 68,Intellectual developmental disorder,not provided		394794	116316		0.02	Benign		None		None		None		4.775
41	41	chr11-65537858 GC>G	SCYL1	frameshift_variant	c.2011delC	p.Gln671fs	ENST00000270176.10	Pathogenic	PVS1,PM2	10							0.01	Benign		None		None		None		-174
42	42	chr2-74073621 G>A	TET3	missense_variant	c.2567G>A	p.Arg856Gln	ENST00000409262.8	Uncertain_significance	PM1,PM2,PP3	5					685501	33	0	Benign	0.482	Uncertain_significance	0.9628	None	0.4	Pathogenic	[0.788, 0.846]	9.817	5.36
44	44	chr17-80369783 C>G	RNF213	missense_variant	c.12341C>G	p.Thr4114Arg	ENST00000582970.6	Likely_pathogenic	PM1,PM2,PM5,PP3	7	Likely pathogenic;Uncertain significance	Moyamoya disease,not provided	criteria provided, single submitter;no assertion criteria provided			2026-09-23	0.03	Benign	0.403	Uncertain_significance	0.5879	None	-0.16	Benign	[0.724, 0.706]	7.134	2026-11-05
45	45	chr3-12585166 T>C	RAF1	missense_variant	c.1624A>G	p.Met542Val	ENST00000251849.9	Uncertain_significance	PM2	2					684044	2026-06-25	0	Benign	0.578	Uncertain_significance	0.2457	None	0.08	Uncertain_significance	[0.793, 0.778]	6.234	5.65
46	46	chr22-19178128 C>T	SLC25A1	splice_region_variant	c.202+5G>A		ENST00000215882.10	Uncertain_significance	PM2,PP3	3	Uncertain significance	not provided	criteria provided, single submitter		359539		0.42	Uncertain_significance		None		None	-0.32	Benign		5.296
47	47	chr12-121439983 G>A	KDM2B	missense_variant	c.3703C>T	p.Arg1235Cys	ENST00000377071.9	Likely_benign	BS2	-4				262788	521159	33	0	Benign	0.366	Uncertain_significance	0.7861	None	0.08	Uncertain_significance	[0.789, 0.87, 0.732]	4.257	4.93
48	48.1	chr3-49652934 C>G	BSN	stop_gained	c.3378C>G	p.Tyr1126*	ENST00000296452.5	Pathogenic	PVS1,PM2	10						35	0	Benign		None		None	0.52	Pathogenic	882	1.586	3.84
	48.2	chr3-49652934 C>G	BSN	stop_gained	c.3378C>G	p.Tyr1126*	ENST00000296452.5	Pathogenic	PVS1,PM2	10						35	0	Benign		None		None	0.52	Pathogenic	882	1.586	3.84
49	49	chr3-11034651 G>A	SLC6A1	missense_variant	c.1648G>A	p.Gly550Arg	ENST00000287766.10	Pathogenic	PS1_Moderate,PM2,PP3,PP5_Very_Strong	13	Pathogenic/Likely pathogenic;Likely pathogenic;Pathogenic	Epilepsy with myoclonic atonic seizures,Global developmental delay,not provided	criteria provided, single submitter;criteria provided, multiple submitters, no conflicts			35	0.57	Pathogenic	0.659	Pathogenic	0.9932	None	0.26	Pathogenic	0.87	6.602	4.89
50	50	chr12-57199380 A>G	LRP1	missense_variant	c.9845A>G	p.His3282Arg	ENST00000243077.8	Uncertain_significance	PM2,PP3	3						22	0	Benign	0.758	Pathogenic	0.9783	Pathogenic	0.35	Pathogenic	0.82	9.241	4.98
51	51	chr11-68074717 C>G	CHKA	splice_region_variant	c.630G>C	p.Pro210Pro	ENST00000265689.9	Likely_pathogenic	PM2,PP3_Strong	6					684146		0.74	Pathogenic		None		None	-0.3	Benign		-346
52	52	chr12-109561044 T>C	MMAB	missense_variant	c.580A>G	p.Arg194Gly	ENST00000545712.7	Pathogenic	PM1,PM2,PP3_Strong,PP5_Moderate	10	Likely pathogenic	cblB type,Methylmalonic aciduria	criteria provided, single submitter			2026-04-23	0	Benign	0.943	Pathogenic	0.8175	None	0.49	Pathogenic	[0.952, 0.947]	1.251	3.74
53	53	chrX-53403561 C>T	SMC1A	splice_region_variant	c.2420+5G>A		ENST00000322213.9	Uncertain_significance	PM2,PP3_Moderate	4	Uncertain significance	Congenital muscular hypertrophy-cerebral syndrome	criteria provided, single submitter				0.78	Pathogenic		None		None	-0.32	Benign		4.033
54	54	chr1-155235252 A>G	GBA1	missense_variant	c.1448T>C	p.Leu483Pro	ENST00000368373.8	Pathogenic	PM5,PP2,PP3,PP5_Very_Strong,BP4	11	Likely pathogenic;risk factor;Pathogenic	Lewy body, late-onset, susceptibility to,7 conditions,Dementia,GBA1-related disorder,Gaucher disease,Gaucher disease perinatal lethal,Gaucher disease type I,Gaucher disease type II,Gaucher disease type III,Gaucher disease-ophthalmoplegia-cardiovascular calcification syndrome,Hypomimic face,Lewy body dementia,Movement disorder,Parkinson disease,Parkinsonian disorder,Resting tremor,Thoracolumbar sc…	no assertion criteria provided;criteria provided, single submitter;criteria provided, multiple submitters, no conflicts	236898	12957	2026-03-25	0	Benign	0.858	Pathogenic	0.6022	None	0.56	Pathogenic	[0.962, 0.962, 0.957, 0.961]	7.949	3.16
		chr1-155238174 C>T	GBA1	missense_variant	c.721G>A	p.Gly241Arg	ENST00000368373.8	Pathogenic	PM1,PP2,PP3_Moderate,PP5_Very_Strong	13	Pathogenic	late-onset,Gaucher disease,Gaucher disease type I,Gaucher disease type II,Gaucher disease type III,Gaucher disease-ophthalmoplegia-cardiovascular calcification syndrome,Parkinson disease,not provided	criteria provided, single submitter;criteria provided, multiple submitters, no conflicts	262926	318114	2026-08-20	0.03	Benign	0.798	Pathogenic	0.4855	None	0.44	Pathogenic	[0.816, 0.816, 0.716, 0.714]	5.202	3.66
55	55	chrX-5903496 G>A	NLGN4X	synonymous_variant	c.1182C>T	p.Asp394Asp	ENST00000381095.8	Likely_benign	PM2,BP4_Strong,BP7	-3					913733		0	Benign		None		None	-0.52	Benign		535
56	56	chr9-131506454 G>T	POMT1	splice_donor_variant	c.280+1G>T		ENST00000402686.8	Pathogenic	PVS1_Moderate,PM2,PP5_Very_Strong	12	Pathogenic	type A1, type B1,Autosomal recessive limb-girdle muscular dystrophy type 2K,Muscular dystrophy-dystroglycanopathy (congenital with brain and eye anomalies),Muscular dystrophy-dystroglycanopathy (congenital with intellectual disability),Walker-Warburg congenital muscular dystrophy,not provided	criteria provided, single submitter;criteria provided, multiple submitters, no conflicts		795292	34	1	Pathogenic		None		None	0.41	Pathogenic		9.061	5.61
56	56	chr9-131522967 T>C	POMT1	missense_variant	c.2039T>C	p.Val680Ala	ENST00000402686.8	Uncertain_significance	PM2,BP4	1						17.87	0	Benign	0.323	Uncertain_significance	0.1373	None	-0.11	Benign	[0.12, 0.14, 0.123, 0.075, 0.096]	1.546	5.25
57	57	chr3-49422290 A>C	AMT	intron_variant	c.91-19T>G		ENST00000273588.9	Uncertain_significance	PM2	2					68423		0.36	Uncertain_significance		None		None	-0.8	Benign		676
58	58	chr2-196912877 C>T	PGAP1	splice_region_variant	c.649+5G>A		ENST00000354764.9	Uncertain_significance	PM2,PP3	3							0.49	Uncertain_significance		None		None	-0.16	Benign		4
59	59	chr2-60461495 C>A	BCL11A	stop_gained	c.1417G>T	p.Glu473*	ENST00000642384.2	Pathogenic	PVS1,PM2,PP5_Moderate	12	Pathogenic	Dias-Logan syndrome	criteria provided, single submitter		0	49	0	Benign		None		None	0.66	Pathogenic	[0.989, 0.951]	7.905	5.27
60	60	chr7-56083379 C>T	PHKG1	missense_variant	c.446G>A	p.Arg149Gln	ENST00000297373.7	Uncertain_significance	PM2,PP3_Moderate	4				262892	278425	34	0.09	Benign	0.635	Uncertain_significance	0.9143	None	0.3	Pathogenic	[0.976, 0.986, 0.984]	7.837	5.47
61	61	chr18-46086457 C>T	ATP5F1A	missense_variant	c.1214G>A	p.Arg405His	ENST00000398752.11	Uncertain_significance	PM2,PP3_Moderate	4	Uncertain significance	not provided	criteria provided, single submitter	657644	397772	33	0	Benign	0.838	Pathogenic	0.987	None	0.37	Pathogenic	[0.877, 0.878, 0.877, 0.862]	7.905	4.66
62	62	chr12-40930003 G>A	CNTN1	splice_donor_variant	c.703+1G>A		ENST00000551295.7	Uncertain_significance	PVS1_Moderate,PM2	4					800333	34	0.95	Pathogenic		None		None	0.36	Pathogenic		8.979	5.39
63	63	chr4-6301815 G>A	WFS1	missense_variant	c.2020G>A	p.Gly674Arg	ENST00000226760.5	Likely_pathogenic	PM1,PM5,PP3_Moderate,PP5	7	Pathogenic/Likely pathogenic;Likely pathogenic;Pathogenic;Uncertain significance	Autosomal dominant nonsyndromic hearing loss 6,Cataract 41,Diabetes mellitus,Hearing impairment,Inborn genetic diseases,Optic atrophy,Retinal dystrophy,Type 2 diabetes mellitus,WFS1-Related Spectrum Disorders,WFS1-related disorder,Wolfram syndrome 1,Wolfram-like syndrome,not provided,not specified	no assertion criteria provided;criteria provided, single submitter;criteria provided, multiple submitters, no conflicts	157646	243457	2026-08-25	0	Benign	0.944	Pathogenic	0.9943	None	0.53	Pathogenic	[0.959, 0.957]	9.405	5.49
		chr4-6301603 T>G	WFS1	missense_variant	c.1808T>G	p.Val603Gly	ENST00000226760.5	Uncertain_significance	PM1,PM2	4				65735	684084	13.85	0	Benign	0.336	Uncertain_significance	0.1779	None	-0.02	Uncertain_significance	[0.289, 0.275]	3.255	586

## Sheet: HPOs
RareBoost ID	HPOs
RB_2023_01.1	Microcephaly HP:0000252 Optic disc coloboma HP:0000588 Optic atrophy HP:0000648 Respiratory distress HP:0002098 Talipes equinovarus HP:0001762 Generalized hypotonia HP:0001290 Cerebellar atrophy HP:0001272 Reduced tendon reflexes HP:0001315 Aplasia/Hypoplasia of the cerebellum HP:0007360 Hypoplasia of the corpus callosum HP:0002079 Atrophy/Degeneration affecting the brainstem HP:0007366 Seizure H…
RB_2023_03.1	Epileptic encephalopathy HP:0200134 Seizure HP:0001250 Delayed speech and language development HP:0000750 Autism HP:0000717 Motor regression HP:0033044 Titubation HP:0030187 Ataxia HP:0001251 Stereotypical hand wringing HP:0012171 Narrow forehead HP:0000341 Highly arched eyebrow HP:0002553 Long eyelashes HP:0000527 Hypertelorism HP:0000316 Depressed nasal bridge HP:0005280 Bulbous nose HP:0000414…
RB_2023_04.1	Ataxia HP:0001251 Hearing impairment HP:0000365 Global developmental delay HP:0001263 Neurodevelopmental delay HP:0012758 Osteochondroma HP:0030431 Motor delay HP:0001270 Encephalopathy HP:0001298 Kyphoscoliosis HP:0002751 Nail dystrophy HP:0008404 Loss of ambulation HP:0002505 Positive Romberg sign HP:0002403 Muscle weakness HP:0001324 Hyperintensity of cerebral white matter on MRI HP:0030890 Po…
RB_2023_05.1.1	Intellectual disability HP:0001249 Autism HP:0000717 Seizure HP:0001250
RB_2023_05.1.2	Intellectual disability HP:0001249 Autism HP:0000717 Seizure HP:0001250
RB_2023_07.1
RB_2023_08.1.1	Seizure HP:0001250 Intellectual disability HP:0001249 Progressive neurologic deterioration HP:0002344 Severe global developmental delay HP:0011344 Hypotonia HP:0001252 Developmental regression HP:0002376 EEG abnormality HP:0002353 Microcephaly HP:0000252 Orofacial dyskinesia HP:0002310 Strabismus HP:0000486 Absent speech HP:0001344 Spasticity HP:0001257 Hyperactive deep tendon reflexes HP:0006801…
RB_2023_07.1	Cerebellar atrophy HP:0001272 Aplasia/Hypoplasia of the cerebellum HP:0007360 Intellectual disability HP:0001249 Seizure HP:000125 Hearing impairment HP:0000365 Global developmental delay HP:0001263 Microcephaly HP:0000252
RB_2023_09.1	Progressive cerebellar ataxia HP:0002073 Focal T2 hyperintense basal ganglia lesion HP:0007183 Symmetric lesions of the basal ganglia HP:0007039 Strabismus HP:0000486 Increased circulating lactate concentration HP:0002151 Reduced circulating growth hormone concentration HP:0034323 Failure to thrive HP:0001508 Prolonged QT interval HP:0001657 Astigmatism HP:0000483 Reduced circulating growth hormo…
RB_2023_11.1.1	Ataxia HP:0001251 Dysmetria HP:0001310 Dysarthria HP:0001260 Wide nasal bridge HP:0000431 Long philtrum HP:0000343 Hypotonia HP:0001252
RB_2023_11.1.2	Ataxia HP:0001251 Dysmetria HP:0001310 Dysarthria HP:0001260 Wide nasal bridge HP:0000431 Long philtrum HP:0000343 Hypotonia HP:0001252
RB_2023_11.2
RB_2023_11.3
RB_2023_11.4
RB_2023_11.5
RB_2023_11.6
RB_2023_12.1
RB_2024_01.1	Poor head control HP:0002421 Absent speech HP:0001344 Global developmental delay HP:0001263 EEG abnormality HP:0002353 Inability to walk HP:0002540 Delayed ability to sit HP:0025336 Seizure HP:0001250 Elevated circulating creatine kinase concentration HP:0003236
RB_2024_01.2	YOK
RB_2024_01.3	YOK
RB_2024_02.1	Intellectual disability HP:0001249 Attention deficit hyperactivity disorder HP:0007018 Ataxia HP:0001251 Progressive cerebellar ataxia HP:0002073 Gait ataxia HP:0002066 Prolonged prothrombin time HP:0008151 Prolonged bleeding time HP:0003010 Gingival bleeding HP:0000225 Epistaxis HP:0000421 Long face HP:0000276 Disproportionate tall stature HP:0001519 Dilated cardiomyopathy HP:0001644 Cryptorchid…
RB_2024_03.1	Microphthalmia HP:0000568 Deeply set eye HP:0000490 High hypermetropia HP:0008499 Hypotonia HP:0001252 Motor stereotypy HP:0000733 Frontal bossing HP:0002007 Global developmental delay HP:0001263 Seizure HP:0001250 Low-set ears HP:0000369 Hypertelorism HP:0000316 High palate HP:0000218 Hypospadias HP:0000047 Relative macrocephaly HP:0004482 Macrocephaly HP:0000256 Bilateral microphthalmos HP:0007…
RB_2024_04.1	Oral bleeding HP:0040184 Oral cavity bleeding HP:0030140 Gingival bleeding HP:0000225 Prolonged bleeding time HP:0003010 Prolonged prothrombin time HP:0008151 Hematuria HP:0000790 Spontaneous hematomas HP:0007420 ???? Abnormal bleeding HP:0001892 Abnormality of coagulation HP:0001928 Abnormality of vitamin K metabolism HP:0100831 Reduced coagulation factor V activity HP:0003225 Reduced factor VII…
RB_2024_05.1.1	Paucity of anterior horn motor neurons HP:0007277 Motor polyneuropathy HP:0007178 Motor axonal neuropathy HP:0007002 EMG: neuropathic changes HP:0003445 Distal muscle weakness HP:0002460 Scoliosis HP:0002650 Neurodevelopmental abnormality HP:0012759 Neurodevelopmental delay HP:0012758 Motor delay HP:0001270 Seizure HP:0001250
RB_2024_05.1.2	Paucity of anterior horn motor neurons HP:0007277 Motor polyneuropathy HP:0007178 Motor axonal neuropathy HP:0007002 EMG: neuropathic changes HP:0003445 Distal muscle weakness HP:0002460 Scoliosis HP:0002650 Neurodevelopmental abnormality HP:0012759 Neurodevelopmental delay HP:0012758 Motor delay HP:0001270 Seizure HP:0001250
RB_2024_07.1	Short stature HP:0004322 Proportionate short stature HP:0003508 Disproportionate short-trunk short stature HP:0003521 Skeletal dysplasia HP:0002652 Spondyloepiphyseal dysplasia HP:0002655 Spondylometaphyseal dysplasia HP:0002657 Severe platyspondyly HP:0004565 Platyspondyly HP:0000926 Hypoplastic iliac wing HP:0002866 Flat capital femoral epiphysis HP:0003370 Aplasia of the femoral head HP:010086…
RB_2024_08.1	Global developmental delay HP:0001263 Anophthalmia HP:0000528 Microphthalmia HP:0000568 Abnormality of globe size HP:0100887 Cleft palate HP:0000175 Cleft lip HP:0410030 Low-set, posteriorly rotated ears HP:0000368 Microretrognathia HP:0000308 Ventriculomegaly HP:0002119 Caudal appendage HP:0002825 Abnormal coccyx morphology HP:0008519 Abnormality of the vertebral column HP:0000925 Hypospadias HP…
RB_2024_09.1
RB_2024_09.2
RB_2024_09.3
RB_2024_09.4
RB_2024_11.1	Moderate global developmental delay HP:0011343 Autistic behavior HP:0000729 Seizure HP:0001250 Progressive neurologic deterioration HP:0002344 Atonic seizure HP:0010819 Intellectual disability HP:0001249 Neurodevelopmental delay HP:0012758 Relative macrocephaly HP:0004482 Macrocephaly HP:0000256 Overgrowth HP:0001548 EEG abnormality HP:0002353 Delayed speech and language development HP:0000750
RB_2024_12.1.1
RB_2024_12.1.2
RB_2024_13.1
RB_2024_15.1	Lipodystrophy HP:0009125
RB_2024_16.1
RB_2024_17.1
RB_2024_18.1	Hypotonia HP:0001252 Intellectual disability HP:0001249 Seizure HP:0001250 Peripheral neuropathy HP:0009830 Muscle weakness HP:0001324 Tapered finger HP:0001182 Oculomotor apraxia HP:0000657 Loss of ambulation HP:0002505 Abnormal facial shape HP:0001999 Delayed speech and language development HP:0000750 Gait ataxia HP:0002066 High palate HP:0000218 Hyperactive deep tendon reflexes HP:0006801 EEG …
RB_2024_19.1	Abnormal facial shape HP:0001999 Absent speech HP:0001344 Delayed speech and language development HP:0000750 Motor stereotypy HP:0000733 Cerebral atrophy HP:0002059 Cerebellar atrophy HP:0001272 Cerebral white matter atrophy HP:0012762 Widened subarachnoid space HP:0012704 Ventriculomegaly HP:0002119 Thin corpus callosum HP:0033725 Gait ataxia HP:0002066 Seizure HP:0001250 Intellectual disability…
RB_2024_20.1	Seizure HP:0001250 EEG abnormality HP:0002353 Cognitive regression HP:0034332 Developmental regression HP:0002376 Epileptic encephalopathy HP:0200134
RB_2024_21.1.1	Global developmental delay HP:0001263 Delayed ability to walk HP:0031936 Delayed speech and language development HP:0000750 Brachycephaly HP:0000248 Prominent glabella HP:0002057 Elevated plasma citrulline HP:0011966 Citrullinuria HP:0032397 Posterior embryotoxon HP:0000627 Coarse facial features HP:0000280 Underdeveloped nasal alae HP:0000430 Broad columella HP:0010761 Hallux valgus HP:0001822 A…
RB_2024_21.1.2	Global developmental delay HP:0001263 Delayed ability to walk HP:0031936 Congenital hypothyroidism HP:0000851 Brachycephaly HP:0000248 Sparse hair HP:0008070 Prominent glabella HP:0002057 Coarse facial features HP:0000280 Underdeveloped nasal alae HP:0000430 Posterior embryotoxon HP:0000627
RB_2024_21.2
RB_2024_21.3
RB_2024_21.4
RB_2024_23.1	Optic atrophy HP:0000648 Ophthalmoplegia HP:0000602 Optic neuropathy HP:0001138
RB_2024_24.1	Dementia HP:0000726 Tremor HP:0001337 Bradykinesia HP:0002067
RB_2024_24.2
RB_2024_25.1	Seizure HP:0001250 Elevated circulating creatine kinase concentration HP:0003236 Delayed ability to walk HP:0031936 Intellectual disability HP:0001249
RB_2024_26.1.1	Digital ischemia HP:0033402 Digital ulcer HP:0031917 Hypertension HP:0000822 Cerebral hemorrhage HP:0001342 Acrocyanosis HP:0001063 Raynaud phenomenon HP:0030880 Purpura HP:0000979 Asymmetric septal hypertrophy HP:0001670 Hypertrophic cardiomyopathy HP:0001639 Acral ulceration HP:0006121 Abnormal pulse HP:0032552 Absent pulse HP:0032554 Arterial occlusion HP:0025324
RB_2024_26.1.2	Purpura HP:0000979 Vasculitis HP:0002633
RB_2024_27.1	Intellectual disability HP:0001249 Seizure HP:0001250 Epileptic encephalopathy HP:0200134 Gait ataxia HP:0002066 Cerebellar vermis hypoplasia HP:0001320 Cerebellar atrophy HP:0001272 Coloboma HP:0000589 Abnormality of the lower limb HP:0002814 Hemihypertrophy HP:0001528 Microphthalmia HP:0000568
RB_2024_28.1	Global developmental delay HP:0001263 Severe global developmental delay HP:0011344 Growth delay HP:0001510 Abnormal heart morphology HP:0001627 Abnormality of the kidney HP:0000077 Microcephaly HP:0000252 Highly arched eyebrow HP:0002553 Prominent eyelashes HP:0011231 Thin vermilion border HP:0000233 Abnormal facial shape HP:0001999
RB_2024_29.1	Acne inversa HP:0040154 Inflammatory abnormality of the skin HP:0011123
RB_2024_29.2	Acne inversa HP:0040154 Inflammatory abnormality of the skin HP:0011123
RB_2024_30.1	Severe limb shortening HP:0200083 Severe short-limb dwarfism HP:0008890 Pseudoarthrosis HP:0005864 Wormian bones HP:0002645 Recurrent fractures HP:0002757 Short stature HP:0004322 Pathologic fracture HP:0002756 Dentinogenesis imperfecta HP:0000703 Abnormality of bone mineral density HP:0004348 Intellectual disability, mild HP:0001256
RB_2024_31.1	Neurodevelopmental delay HP:0012758 Ectodermal dysplasia HP:0000968 Reduced cerebral white matter volume HP:0034295 Hypotonia HP:0001252 Decreased circulating antibody level HP:0004313 Cerebellar atrophy HP:0001272 Increased CSF lactate HP:0002490 Abnormal muscle fiber morphology HP:0004303 Abnormal glycosylation HP:0012345 Lactic acidosis HP:0003128 Anhydrosis HP:0000970 Alacrima HP:0000522 Feed…
RB_2024_32.1	Global developmental delay HP:0001263 Delayed gross motor development HP:0002194 Absent speech HP:0001344 Delayed ability to walk HP:0031936 Gait ataxia HP:0002066
RB_2024_33.1	Abnormal male external genitalia morphology HP:0000032 Ambiguous genitalia, male HP:0000033 Bilateral cryptorchidism HP:0008689 Micropenis HP:0000054 Growth delay HP:0001510 Reduced circulating growth hormone concentration HP:0034323 Congenital hypothyroidism HP:0000851 Decreased circulating cortisol level HP:0008163 Diffuse cerebral atrophy HP:0002506 Diffuse cerebellar atrophy HP:0100275 Ectopi…
RB_2024_34.1	Seizure HP:0001250 Profound global developmental delay HP:0012736 Developmental regression HP:0002376 Motor regression HP:0033044 Developmental regression HP:0002376 Cerebral atrophy HP:0002059 Ventriculomegaly HP:0002119 Progressive ventriculomegaly HP:0007100 EEG abnormality HP:0002353 Epileptic encephalopathy HP:0200134 Synophrys HP:0000664 Narrow forehead HP:0000341 Full cheeks HP:0000293 Hir…
RB_2024_35.1	Esophageal atresia HP:0002032 Asymmetric growth HP:0100555 Intellectual disability HP:0001249 Seizure HP:0001250
RB_2024_36.1	Delayed speech and language development HP:0000750 Autism HP:0000717 Autistic behavior HP:0000729 Reduced eye contact HP:0000817 Aggressive behavior HP:0000718 Attention deficit hyperactivity disorder HP:0007018 Abnormal nonverbal communicative behavior HP:0000758 Motor stereotypy HP:0000733
RB_2024_36.2
RB_2024_36.3
RB_2024_37.1	Autistic behavior HP:0000729 Autism HP:0000717 Motor stereotypy HP:0000733 Increased circulating lactate concentration HP:0002151 Increased serum pyruvate HP:0003542 Immunodeficiency HP:0002721 Recurrent infections HP:0002719 Reduced eye contact HP:0000817 EEG abnormality HP:0002353 Macrocephaly at birth HP:0004488
RB_2024_41.1	Hematuria HP:0000790 Proteinuria HP:0000093 Pericardial effusion HP:0001698 Systemic lupus erythematosus HP:0002725 Pericarditis HP:0001701 Episodic abdominal pain HP:0002574 Recurrent fever HP:0001954 Avascular necrosis HP:0010885 Failure to thrive HP:0001508
RB_2024_51.1	Hyperuricemia HP:0002149 Elevated circulating hepatic transaminase concentration HP:0002910 Fasting hypoglycemia HP:0003162 Lactic acidosis HP:0003128 Hepatomegaly HP:0002240 Abnormal brainstem MRI signal intensity HP:0012747
RB_2024_52.1	Small for gestational age HP:0001518 Premature birth HP:0001622 Reduced tendon reflexes HP:0001315 Hypotonia HP:0001252 Neonatal hypotonia HP:0001319 Syringomyelia HP:0003396 Strabismus HP:0000486 Hypertelorism HP:0000316
RB_2024_53.1.1	Elbow flexion contracture HP:0002987 Strabismus HP:0000486 ??? Hypotonia HP:0001252 Hearing impairment HP:0000365 Nystagmus HP:0000639 Global developmental delay HP:0001263 Intellectual disability HP:0001249 Steppage gait HP:0003376
RB_2024_53.1.2	Hypotonia HP:0001252 Nystagmus HP:0000639 Respiratory distress HP:0002098 Strabismus HP:0000486 Horizontal nystagmus HP:0000666 Pulmonary artery atresia HP:0004935
RB_2024_53.2
RB_2024_53.3	Elbow flexion contracture HP:0002987 Hearing impairment HP:0000365
RB_2024_56.1.1	Seizure HP:0001250 Focal-onset seizure HP:0007359 Focal clonic seizure HP:0002266 Cerebral cortical atrophy HP:0002120 Global developmental delay HP:0001263 Microcephaly HP:0000252 Secondary microcephaly HP:0005484 Encephalopathy HP:0001298 Hypotonia HP:0001252 Microtia HP:0008551 Microtia, first degree HP:0011266 Microtia, second degree HP:0008569 Microtia, third degree HP:0011267
RB_2024_56.1.2	Cerebral cortical atrophy HP:0002120 Cerebral atrophy HP:0002059 Neurodegeneration HP:0002180 Progressive neurologic deterioration HP:0002344 Global developmental delay HP:0001263 Secondary microcephaly HP:0005484 Microcephaly HP:0000252 Seizure HP:0001250 Focal-onset seizure HP:0007359 Focal clonic seizure HP:0002266
RB_2024_58.1
RB_2024_59.1	Global developmental delay HP:0001263 Intellectual disability HP:0001249 Abnormal facial shape HP:0001999 Atypical behavior HP:0000708 Attention deficit hyperactivity disorder HP:0007018 Autistic behavior HP:0000729 Gait disturbance HP:0001288
RB_2024_60.1	Unusual CNS infection HP:0011450 Autoimmunity HP:0002960 Infectious encephalitis HP:0002383 Recurrent meningitis HP:0006946 EEG abnormality HP:0002353 Paroxysmal dystonia HP:0002268 Dystonia HP:0001332 Confusion HP:0001289 Narcolepsy HP:0030050 Hypersomnia HP:0100786 Cataplexy HP:0002524 Excessive daytime somnolence HP:0001262 Drowsiness HP:0002329 Hypersomnia HP:0100786
RB_2024_62.1	Hemolytic anemia HP:0001878 Microcephaly HP:0000252 Short stature HP:0004322 Global developmental delay HP:0001263 Cerebral atrophy HP:0002059 Aplasia/Hypoplasia of the corpus callosum HP:0007370 Strabismus HP:0000486 Mitral valve prolapse HP:0001634 Recurrent viral infections HP:0004429 Brachydactyly HP:0001156 Macrodontia HP:0001572
RB_2024_65.1	Seizure HP:0001250 Neurodevelopmental delay HP:0012758 Microcephaly HP:0000252 Pectus carinatum HP:0000768 Hypotonia HP:0001252 Global developmental delay HP:0001263 Absent speech HP:0001344 Inability to walk HP:0002540 Feeding difficulties HP:0011968 Narrow forehead HP:0000341 Low anterior hairline HP:0000294 Deeply set eye HP:0000490 Thick eyebrow HP:0000574 Long eyelashes HP:0000527 Curly eyel…
RB_2024_66.1	Lymphadenopathy HP:0002716 Neutropenia HP:0001875 Thrombocytopenia HP:0001873 Recurrent infections HP:0002719 Fever HP:0001945 Decreased circulating antibody concentration HP:0004313 Hypothyroidism HP:0000821 Elevated circulating hepatic transaminase concentration HP:0002910
RB_2024_68.1.1	Polyneuropathy HP:0001271 Delayed ability to walk HP:0031936 Areflexia HP:0001284 Falls HP:0002527 Easy fatigability HP:0003388 Short stature HP:0004322 Demyelinating peripheral neuropathy HP:0007108
RB_2024_68.1.2	Polyneuropathy HP:0001271 Scoliosis HP:0002650 (rotoskolyoz) Abnormal curvature of the vertebral column HP:0010674 Poor head control HP:0002421 Areflexia HP:0001284 Falls HP:0002527 Pes cavus HP:0001761 Easy fatigability HP:0003388 Short stature HP:0004322 Demyelinating peripheral neuropathy HP:0007108 (abisine göre daha ağır)
RB_2024_69.1	Failure to thrive HP:0001508 Developmental regression HP:0002376 Hypokalemia HP:0002900 Hypochloremia HP:0003113 Hypocalcemia HP:0002901 Hypomagnesemia HP:0002917 Hypoparathyroidism HP:0000829 Proteinuria HP:0000093 Seizure HP:0001250 Increased circulating lactate concentration HP:0002151 Muscle weakness HP:0001324 2:1 atrioventricular block HP:0034305 Ptosis HP:0000508 Proptosis HP:0000520 Brady…
RB_2024_71.1	Global developmental delay HP:0001263 Delayed speech and language development HP:0000750 Patent ductus arteriosus HP:0001643 Ataxia HP:0001251 Diastasis recti HP:0001540 Microcephaly HP:0000252 Micrognathia HP:0000347 Retrognathia HP:0000278 High palate HP:0000218 + Glaucoma HP:0000501 Dysphagia HP:0002015 Patent ductus arteriosus HP:0001643 Diastasis recti HP:0001540 Delayed speech and language …
RB_2024_72.1	Dystonia HP:0001332 Tremor HP:0001337 Neonatal respiratory distress HP:0002643
RB_2024_73.1	Global developmental delay HP:0001263 Hypotonia HP:0001252 Microcephaly HP:0000252 Autistic behavior HP:0000729 Autism HP:0000717 Seizure HP:0001250 Motor stereotypy HP:0000733 Reduced eye contact HP:0000817 (Aslında hiç göz teması yok.) Congenital hip dislocation HP:0001374 Acetabular dysplasia HP:0008807 Abnormal pelvic girdle bone morphology HP:0002644 Alopecia HP:0001596 Alopecia of scalp HP:…
RB_2024_73.2
RB_2024_73.3
RB_2024_77.1
RB_2024_77.2
RB_2024_77.3
RB_2024_85.1
RB_2024_86.1
RB_2024_87.1
RB_2024_88.1
RB_2024_89.1
RB_2024_90.1
RB_2024_92.1
RB_2024_92.2
RB_2024_92.3
RB_2024_92.4
RB_2024_93.1
RB_2024_93.2
RB_2024_94.1.1
RB_2024_94.1.2
RB_2024_94.1.3
RB_2024_94.2
RB_2024_94.3
RB_2024_96.1
RB_2024_98.1
RB_2025_20.1
RB_2025_21.1

## Sheet: SankeyData
RareBoost ID	Karyotype	Gene Panel, Single Gene	CMA	WES	WGS	RareBoost	RB Reanalysis	RB WES	RB WGS	RB RNA Seq	Unsolved	Novel Gene Disease Assoc.	Solved - VUS	Solved - P/LP
RB_2023_01.1	Karyotype	Gene Panel, Single Gene		WES		RareBoost	RB Reanalysis				Unsolved
RB_2023_03.1	Karyotype	Gene Panel, Single Gene		WES		RareBoost	RB Reanalysis				Unsolved
RB_2023_04.1	Karyotype	Gene Panel, Single Gene	CMA	WES		RareBoost	RB Reanalysis					Novel Gene Disease Assoc.
RB_2023_05.1.1			CMA	WES		RareBoost	RB Reanalysis			RB RNA Seq	Unsolved
RB_2023_08.1.1	Karyotype	Gene Panel, Single Gene	CMA	WES		RareBoost	RB Reanalysis						Solved - VUS
RB_2023_09.1	Karyotype	Gene Panel, Single Gene				RareBoost	RB Reanalysis		RB WGS		Unsolved
RB_2023_11.1.1	Karyotype	Gene Panel, Single Gene		WES		RareBoost	RB Reanalysis						Solved - VUS
RB_2024_01.1			CMA			RareBoost		RB WES			Unsolved
RB_2024_02.1		Gene Panel, Single Gene	CMA	WES		RareBoost	RB Reanalysis	RB WES		RB RNA Seq				Solved - P/LP
RB_2024_03.1		Gene Panel, Single Gene	CMA	WES		RareBoost	RB Reanalysis		RB WGS		Unsolved
RB_2024_04.1				WES		RareBoost	RB Reanalysis		RB WGS		Unsolved
RB_2024_08.1	Karyotype		CMA	WES		RareBoost	RB Reanalysis		RB WGS	RB RNA Seq	Unsolved
RB_2024_09.1		Gene Panel, Single Gene	CMA	WES		RareBoost	RB Reanalysis		RB WGS		Unsolved
RB_2024_11.1				WES		RareBoost	RB Reanalysis				Unsolved
RB_2024_12.1.1				WES		RareBoost
RB_2024_13.1	Karyotype	Gene Panel, Single Gene	CMA			RareBoost
RB_2024_15.1		Gene Panel, Single Gene		WES		RareBoost	RB Reanalysis			RB RNA Seq	Unsolved
RB_2024_16.1	Karyotype					RareBoost
RB_2024_17.1	Karyotype					RareBoost
RB_2024_18.1	Karyotype	Gene Panel, Single Gene		WES		RareBoost			RB WGS					Solved - P/LP
RB_2024_19.1		Gene Panel, Single Gene		WES		RareBoost	RB Reanalysis	RB WES			Unsolved
RB_2024_20.1				WES		RareBoost	RB Reanalysis				Unsolved
RB_2024_21.1.1			CMA	WES		RareBoost	RB Reanalysis				Unsolved
RB_2024_23.1				WES		RareBoost
RB_2024_24.1	Karyotype		CMA	WES		RareBoost	RB Reanalysis							Solved - P/LP
RB_2024_25.1			CMA	WES		RareBoost	RB Reanalysis						Solved - VUS
RB_2024_26.1.1				WES		RareBoost			RB WGS		Unsolved
RB_2024_27.1	Karyotype	Gene Panel, Single Gene		WES		RareBoost			RB WGS				Solved - VUS
RB_2024_28.1	Karyotype	Gene Panel, Single Gene	CMA			RareBoost	RB Reanalysis						Solved - VUS
RB_2024_29.1			CMA	WES		RareBoost	RB Reanalysis				Unsolved
RB_2024_30.1			CMA	WES		RareBoost				RB RNA Seq				Solved - P/LP
RB_2024_31.1	Karyotype	Gene Panel, Single Gene	CMA	WES		RareBoost			RB WGS		Unsolved
RB_2024_32.1		Gene Panel, Single Gene	CMA	WES		RareBoost	RB Reanalysis				Unsolved
RB_2024_34.1	Karyotype		CMA	WES		RareBoost			RB WGS		Unsolved
RB_2024_35.1		Gene Panel, Single Gene	CMA			RareBoost	RB Reanalysis				Unsolved
RB_2024_36.1	Karyotype	Gene Panel, Single Gene	CMA	WES		RareBoost	RB Reanalysis				Unsolved
RB_2024_37.1		Gene Panel, Single Gene	CMA	WES		RareBoost	RB Reanalysis		RB WGS		Unsolved
RB_2024_41.1		Gene Panel, Single Gene				RareBoost			RB WGS				Solved - VUS
RB_2024_51.1				WES		RareBoost	RB Reanalysis							Solved - P/LP
RB_2024_52.1	Karyotype		CMA	WES		RareBoost	RB Reanalysis						Solved - VUS
RB_2024_53.1.2		Gene Panel, Single Gene	CMA			RareBoost		RB WES					Solved - VUS
RB_2024_54.1				WES		RareBoost
RB_2024_56.1.1		Gene Panel, Single Gene	CMA	WES		RareBoost	RB Reanalysis		RB WGS		Unsolved
RB_2024_60.1				WES		RareBoost	RB Reanalysis				Unsolved
RB_2024_62.1	Karyotype		CMA	WES	WGS	RareBoost	RB Reanalysis		RB WGS					Solved - P/LP
RB_2024_65.1	Karyotype		CMA	WES		RareBoost			RB WGS			Novel Gene Disease Assoc.
RB_2024_66.1				WES		RareBoost
RB_2024_68.1.1				WES		RareBoost		RB WES					Solved - VUS
RB_2024_69.1	Karyotype	Gene Panel, Single Gene	CMA	WES		RareBoost			RB WGS					Solved - P/LP
RB_2024_71.1		Gene Panel, Single Gene	CMA			RareBoost		RB WES						Solved - P/LP
RB_2024_72.1				WES		RareBoost	RB Reanalysis				Unsolved
RB_2024_73.1	Karyotype		CMA	WES		RareBoost	RB Reanalysis						Solved - VUS
RB_2024_77.1				WES		RareBoost	RB Reanalysis							Solved - P/LP
RB_2024_85.1	Karyotype		CMA	WES		RareBoost	RB Reanalysis						Solved - VUS
RB_2024_86.1		Gene Panel, Single Gene		WES		RareBoost	RB Reanalysis				Unsolved
RB_2024_87.1	Karyotype		CMA	WES		RareBoost	RB Reanalysis						Solved - VUS
RB_2024_88.1		Gene Panel, Single Gene		WES		RareBoost	RB Reanalysis				Unsolved
RB_2024_89.1				WES		RareBoost	RB Reanalysis				Unsolved
RB_2024_92.1				WES		RareBoost	RB Reanalysis				Unsolved
RB_2024_93.1						RareBoost	RB Reanalysis				Unsolved
RB_2024_96.1		Gene Panel, Single Gene				RareBoost
RB_2024_98.1			CMA	WES		RareBoost	RB Reanalysis							Solved - P/LP
RB_2025_03.1.1		Gene Panel, Single Gene				RareBoost
RB_2025_20.1				WES		RareBoost	RB Reanalysis							Solved - P/LP
RB_2025_21.1				WES		RareBoost	RB Reanalysis						Solved - VUS
RB_2025_10.1		Gene Panel, Single Gene		WES		RareBoost	RB Reanalysis				Unsolved
RB_2024_39.1				WES		RareBoost	RB Reanalysis		RB WGS				Solved - VUS
RB_2024_97.1				WES		RareBoost			RB WGS					Solved - P/LP
RB_2024_99.1		Gene Panel, Single Gene	CMA			RareBoost			RB WGS		Unsolved
RB_2025_01.1	Karyotype			WES		RareBoost	RB Reanalysis				Unsolved
RB_2025_04.1.1		Gene Panel, Single Gene	CMA			RareBoost			RB WGS				Solved - VUS
RB_2025_07.1	Karyotype		CMA			RareBoost			RB WGS		Unsolved
RB_2025_15.1		Gene Panel, Single Gene	CMA			RareBoost			RB WGS				Solved - VUS
RB_2025_17.1	Karyotype	Gene Panel, Single Gene				RareBoost			RB WGS		Unsolved
RB_2025_23.1	Karyotype		CMA	WES		RareBoost			RB WGS		Unsolved
RB_2025_37.1	Karyotype			WES		RareBoost	RB Reanalysis						Solved - VUS
RB_2025_44.1	Karyotype		CMA	WES		RareBoost	RB Reanalysis				Unsolved
RB_2024_91.1	Karyotype	Gene Panel, Single Gene				RareBoost		RB WES					Solved - VUS
RB_2025_18.1		Gene Panel, Single Gene		WES		RareBoost	RB Reanalysis						Solved - VUS
RB_2025_29.1	Karyotype		CMA	WES		RareBoost	RB Reanalysis				Unsolved
RB_2025_84.1				WES		RareBoost	RB Reanalysis						Solved - VUS
RB_2025_54.1				WES		RareBoost	RB Reanalysis						Solved - VUS

## Sheet: SankeyMaticInput
Initial [1] RareBoost Karyotype [15] Gene Panel, Single Gene Karyotype [20] CMA Karyotype [24] WES Karyotype [1] WGS Gene Panel, Single Gene [19] CMA Gene Panel, Single Gene [22] WES CMA [29] WES CMA [1] WGS WES [1] WGS WES [62] RareBoost Gene Panel, Single Gene [6] RareBoost CMA [10] RareBoost Karyotype [2] RareBoost WGS [1] RareBoost RareBoost [52] RB Reanalysis RareBoost [5] RB WES RareBoost […
